# Supplementary material for: High Efficacy of the Volatile Organic Compounds of Streptomyces yanglinensis 3-10 in Suppression of Aspergillus Contamination on Peanut Kernels
Source: Front Microbiol. 2020 Feb 6;11:142. doi: 10.3389/fmicb.2020.00142 (PMC7015977; doi:10.3389/fmicb.2020.00142)
Supplement: Supplementary file 1 [file Data_Sheet_1.pdf]

**High efficacy of the Volatile Organic Compounds of *Streptomyces yanglinensis* 3-10 in Suppression of *Aspergillus* Contamination on Peanut Kernels**

Ang Lyu<sup>1,2,3</sup>, Long Yang<sup>1,2</sup>, Jing Zhang<sup>1,2</sup>, Mingde Wu<sup>1,2</sup>, and Guoqing Li<sup>1,2\*</sup>

<sup>1</sup>State Key Laboratory of Agricultural Microbiology and Key Laboratory of Plant Pathology of Hubei Province, <sup>2</sup>Huazhong Agricultural University, Wuhan 430070, China

<sup>3</sup>School of life science and technology, Hubei Engineering University, Xiaogan 432000, China

\*Correspondence: Dr. Guoqing Li, E-mail: guoqingli@mail.hzau.edu.cn

## **I. Supplementary Tables**

**Supplementary Table S1.** List of the microbial isolates used in this study.

| Test fungus and isolates                                  | Host and/or origin*                                    |
|-----------------------------------------------------------|--------------------------------------------------------|
| Actinomycetes                                             |                                                        |
| <i>Streptomyces yanglinensis</i> 3-10                     | Rice ( <i>Oryza sativa</i> ), HZAU                     |
| Fungi                                                     |                                                        |
| <i>Alteraria alternata</i> TBS-3                          | Tobacco ( <i>Nicotiana tabacum</i> ), HZAU             |
| <i>Aspergillus flavus</i> NRRL3357                        | Peanut ( <i>Arachis hypogaea</i> ), NRRL               |
| <i>Aspergillus parasiticus</i> MO527                      | Rice Rice ( <i>Oryza sativa</i> ), CGMCC               |
| <i>Botrytis cinerea</i> RoseBC-3                          | Rose ( <i>Rosa chinensis</i> ), HZAU                   |
| <i>Bipolaris maydis</i> MB-1                              | Maize ( <i>Zea mays</i> ), HZAU                        |
| <i>Curvularia lunata</i> CFW-4                            | Rice ( <i>Oryza sativa</i> ), HZAU                     |
| <i>Colletotrichum siamense</i> Nj-2                       | Strawberry ( <i>Fragaria</i> × <i>ananassa</i> ), HAAS |
| <i>Drechslera graminea</i> BGW014                         | Barley ( <i>Hordeum vulgare</i> ), HZAU                |
| <i>Fusarium moniliforme</i> WF-3                          | Rice ( <i>Oryza sativa</i> ) , HZAU                    |
| <i>Fusarium oxysporum</i> f. sp. <i>vasinfectum</i> FO-25 | Cotton ( <i>Gossypium hirsutum</i> ), HAAS             |
| <i>Gaeumanomyces graminis</i> var. <i>tritici</i>         | Wheat ( <i>Triticum aestivum</i> L.), HnAAS            |
| <i>Monilia fructigena</i> BT15-56                         | Peach ( <i>Amygdalus persica</i> ), HZAU               |
| <i>Mucor hiemalis</i> WHT-1                               | Tomato ( <i>Lycopersicon esculentum</i> ), HZAU        |
| <i>Pestalotia theae</i> DMZ21                             | Rice ( <i>Oryza sativa</i> ), HZAU                     |
| <i>Pyricularia oryzae</i> PB-1                            | Rice ( <i>Oryza sativa</i> ), HZAU                     |
| <i>Rhizoctonia solani</i> WH-1                            | Rice ( <i>Oryza sativa</i> ), HZAU                     |
| <i>Rhizopus stolonifer</i> WHS-1                          | Strawberry ( <i>Fragaria</i> × <i>ananassa</i> ), HZAU |
| <i>Sclerotinia minor</i> Lc-45                            | Lettuce ( <i>Lactuca sativa</i> ), HZAU                |
| <i>Sclerotinia sclerotiorum</i> Ss-1                      | Oilseed rape ( <i>Brassica napus</i> ), HZAU           |
| <i>Sclerotium rolfsii</i> B-1                             | Plumepoppy ( <i>Macleaya cordata</i> ), HZAU           |
| Oomycetes                                                 |                                                        |
| <i>Pythium ultimum</i> WLOW2F                             | Watermelon ( <i>Citrullus lanatus</i> ), WAAST         |
| <i>Pythium aphanidermatum</i> Py-xg                       | Watermelon ( <i>Citrullus lanatus</i> ), WAAST         |

\*NRRL = Agricultural Research Service Culture Collection, United States Department of Agriculture; CGMCC = China General Microbiological Culture Collection Center, Beijing, China; HbAAS = Hubei Academy of Agricultural Sciences, Wuhan, China; HnAAS = Henan Academy of Agricultural Sciences, Zhengzhou, China; HZAU = Huazhong Agricultural University, Wuhan, China; WAAST = Wuhan Academy of Agricultural Science and Technology, Wuhan, China.

**Supplementary Table S2.** List of the oligonucleotide primers for RT- PCR amplification in this study.

| Gene                                 | GenBank<br>Acc. No. | Sequence (5'-3')                                                                                                                | Thermal program in RT-PCR                                                                                                                   | Size of the<br>RT-PCR product |
|--------------------------------------|---------------------|---------------------------------------------------------------------------------------------------------------------------------|---------------------------------------------------------------------------------------------------------------------------------------------|-------------------------------|
| 2-MIB synthase<br>gene               | MK861971            | Forward:<br>TGGTTGTGGATC<br>TCGACACTG<br>Reverse:<br>ACCTCGTCACGG<br>CCTACTAC                                                   | Initial denaturation: 95°C for 5<br>min; 32 cycles: 95°C for 30s,<br>56°C for 30s, 72°C for 1 min 15s;                                      | 1107 bp                       |
| Methyltransfer-ase<br>gene           | MK861972            | Forward:<br>AGAAACGGTTCT<br>TCGACCCC<br>Reverse:<br>CTGAGGAGAACC<br>CGGTCAAC                                                    | Initial denaturation: 95°C for 5<br>min; 32 cycles: 95°C for 30s,<br>56°C for 30s, 72°C for 1 min;                                          | 876 bp                        |
| Geosmin synthase<br>gene             | MK861973            | Forward:<br>CTCGTGCCAGGT<br>GAGGATGCC<br>Reverse:<br>CGCGTTCTACGT<br>GCCGTACC                                                   | Initial denaturation: 95°C for 5<br>min; 32 cycles: 95°C for 30s,<br>56°C for 30s, 72°C for 2 min 15s;                                      | 2277 bp                       |
| Aryl-alcohol<br>dehydrogenase gene   | MK861974            | Forward:<br>GATGTGCCGGAC<br>CGACC<br>Reverse:<br>GATGAGCTGGTC<br>GAAGGGGAA                                                      | Initial denaturation: 95°C for 5<br>min; 32 cycles: 95°C for 30s,<br>56°C for 30s, 72°C for 1min; final                                     | 1066 bp                       |
| (+)-β-caryophyllene<br>synthase gene | MK861975            | Forward:<br>CAGATCACCTTA<br>CCGGCGTT<br>Reverse:<br>TCGATCAGTTCC<br>CTTTCCGC                                                    | Initial denaturation: 95°C for 5<br>min; 32 cycles: 95°C for 30s,<br>55°C for 30s, 72°C for 1 min;                                          | 975 bp                        |
| gyrB gene                            | MK861976            | Forward:<br>GAGGTCGTGCTG<br>ACCGTGCTGCAC<br>GCGGGCGGCAA<br>GTTCCGGC<br>Reverse:<br>GTTGATGTGCTG<br>GCCGTCGACGTC<br>GGCGTCCGCCAT | Initial denaturation: 95°C for 5<br>min; 32 cycles: 95°C for 30s,<br>65°C for 30s, 72°C for 1 min 30s;<br>final extension: 72°C for 10 min. | 1284 bp                       |

**Supplementary Table S3.** List of the oligonucleotide primers for qRT- PCR analysis in this study.

| Gene name | Gene functions                                                                                                                                               | Primers used in the qRT-PCR                              |
|-----------|--------------------------------------------------------------------------------------------------------------------------------------------------------------|----------------------------------------------------------|
| aflR      | Pathway regulator                                                                                                                                            | F:AGCACTACAAACACTGACCCAC<br>R:CCAGCACCTTGAGAACGATAA      |
| aflCa     | Noranthrone monooxygenase, Norsolorinate-anthrone to norsolorinate                                                                                           | F: GCACCAATGGAGCCGTAT<br>R: GCGGTGTTTCGTAGCGTTC          |
| aflA      | FAS alpha subunit, Acetate to polyketide                                                                                                                     | F: CGTGAGGTCAAGGCATTCCT<br>R: GACTTGCCCCCCTTCTGT         |
| aflS      | Transcription enhancer, Pathway regulator                                                                                                                    | F: CCGAAGATTCCGCTTGGA<br>R: TGAAGACATGCAGCAAAAGGA        |
| aflO      | O-methyltransferase B, dihydrodemethylsterigmatocystin to dihydrosterigmatocystin                                                                            | F: TGCTGTGGCATCCATTCAAA<br>R: GGACTGCGTCTTCCAAAAGG       |
| aflD      | NOR reductase, norsolorinic acid to averantin                                                                                                                | F: ACTGCGACTCGGAACTGATG<br>R: TGCTCCTCCCGCAATGTC         |
| aflP      | O-methyltransferase A, sterigmatocystin to O-methylsterigmatocystin                                                                                          | F:<br>TGTGTCGAGTGATGTGGGACTAG<br>R: GCCACCCAGCTCAACCTACA |
| aflF      | NOR dehydrogenase, norsolorinic acid to averantin                                                                                                            | F: AAGATGCTGGGCACGTTTG<br>R: CATGGGTGAGGACGAATTGG        |
| aflQ      | Oxydoreductase, O-methylsterigmatocystin to AFB <sub>1</sub> and AFG <sub>1</sub> , dihydro-Omethylsterigmatocystin to AFB <sub>2</sub> and AFG <sub>2</sub> | F: TTGCTGGGCTTGTGGATTC<br>R: GAGGAGGACGCGTGTCTTTG        |
| aflX      | Monooxygenase/oxidase, VA to DMST                                                                                                                            | F: ACCGCGTTGCACATCGT<br>R: TGGGTGTCCACAACCTTCGT          |
| AccC      | Acetyl-CoA carbosylase, Acetyl-CoA to Malonlyl-CoA                                                                                                           | F: ATGGTAAGACCTGCCTGCTA<br>R: AGCGAGGATACCGAGGAT         |
| β-tubulin | Endogenous control, Reference gene                                                                                                                           | F: AGCAGGCGAAGAAGGAGG<br>R: ACGCCACGCATTGATCTTC          |

**Reference:** Gong, A. D., Wu, N. N., Kong, X. W., Zhang, Y. M., Hu, M. J., Gong, S. J., Dong, F. Y., Wang, J. H., Zhao, Z. Y., and Liao, Y. C. (2019) Inhibitory effect of volatiles emitted from *Alcaligenes faecalis* N1-4 on *Aspergillus flavus* and aflatoxins in storage. *Front. Microbiol.* 10:1419. doi: 10.3389/fmicb.2019.01419

**Supplementary Table S4.** Effects of the volatile organic compounds (VOCs) from the autoclaved wheat grains (AWG) cultures of *Streptomyces yanglinensis* 3-10 and soil amendment with the AWG cultures of this strain on peanut seedlings growth.

| Character            | Fumigation with the VOCs                                             |                                                                      |                           | Soil amendment with live culture of <i>S. yanglinensis</i> 3-10        |                           |
|----------------------|----------------------------------------------------------------------|----------------------------------------------------------------------|---------------------------|------------------------------------------------------------------------|---------------------------|
|                      | AWG culture of <i>S. yanglinensis</i> 3-10 at 12 g/L<br><i>n</i> =16 | AWG culture of <i>S. yanglinensis</i> 3-10 at 34 g/L<br><i>n</i> =16 | Fresh AWG<br><i>n</i> =16 | AWG culture of <i>S. yanglinensis</i> 3-10 at 5% (w/w)<br><i>n</i> =16 | Fresh AWG<br><i>n</i> =16 |
| Height (cm)          | 14.1 ± 1.9                                                           | 11.8 ± 2.2*                                                          | 14.9 ± 1.70               | 16.1 ± 4.6                                                             | 16.7 ± 3.2                |
| TDW (g per seedling) | 0.39 ± 0.09                                                          | 0.38 ± 0.10                                                          | 0.41 ± 0.11               | 1.02 ± 0.25                                                            | 1.05 ± 0.26               |

\*Significantly different ( $P < 0.05$ ) in comparison with that in the control treatment according to Student's *T* test. TDW =Total dry weight

## **II. Supplementary Figures**

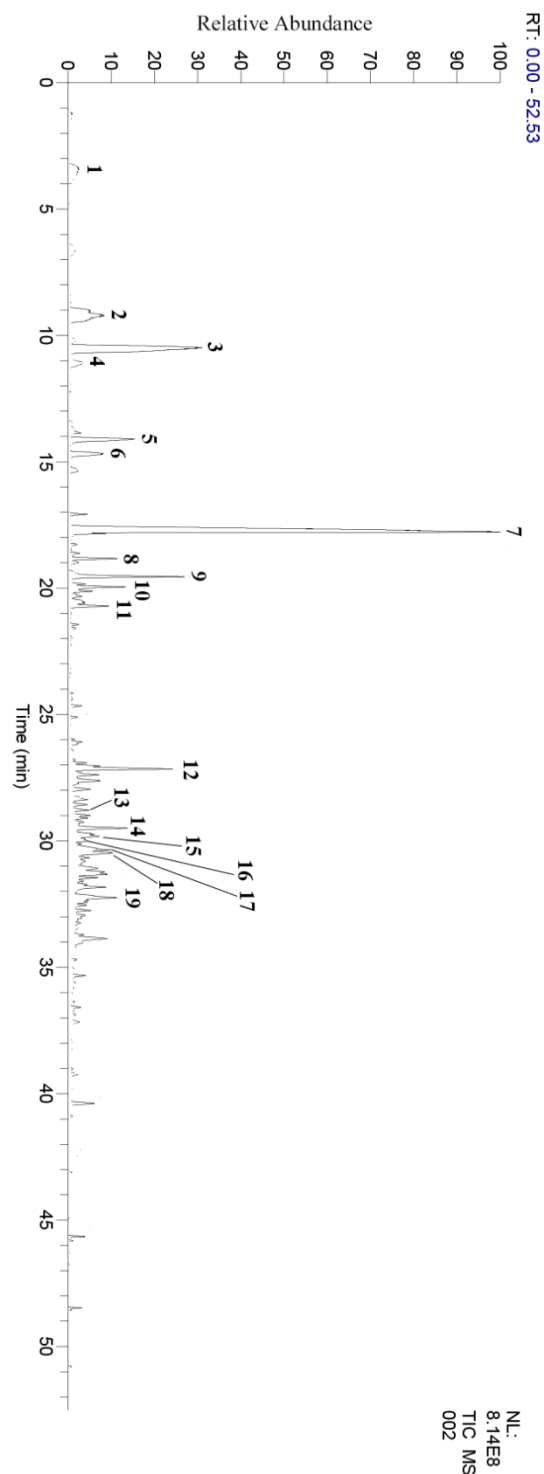

**Supplementary Figure S1.** A SPME-GC-MS chromatogram showing 19 volatile organic compounds (VOCs) emitted from a 10-day-old AWG culture of *Streptomyces yanglinensis* 3-10 (AWG = autoclaved wheat grains). Chemical identity of the labeled VOCs was listed in Table 1. **Peak 1**, methyl 2-methylbutyrate (M2M); **Peak 3** = 2-methyl-2-bornene (2-M2B); **Peak 6**, 2-Phenylethanol (2-PE); **Peak 7**, 2-methylisoborneol (2-MIB); **Peak 12**, *trans*-1,10-dimethyl-*trans*-9-decalinol (geosmin); **Peak 13**, (+)- $\beta$ -caryophyllene

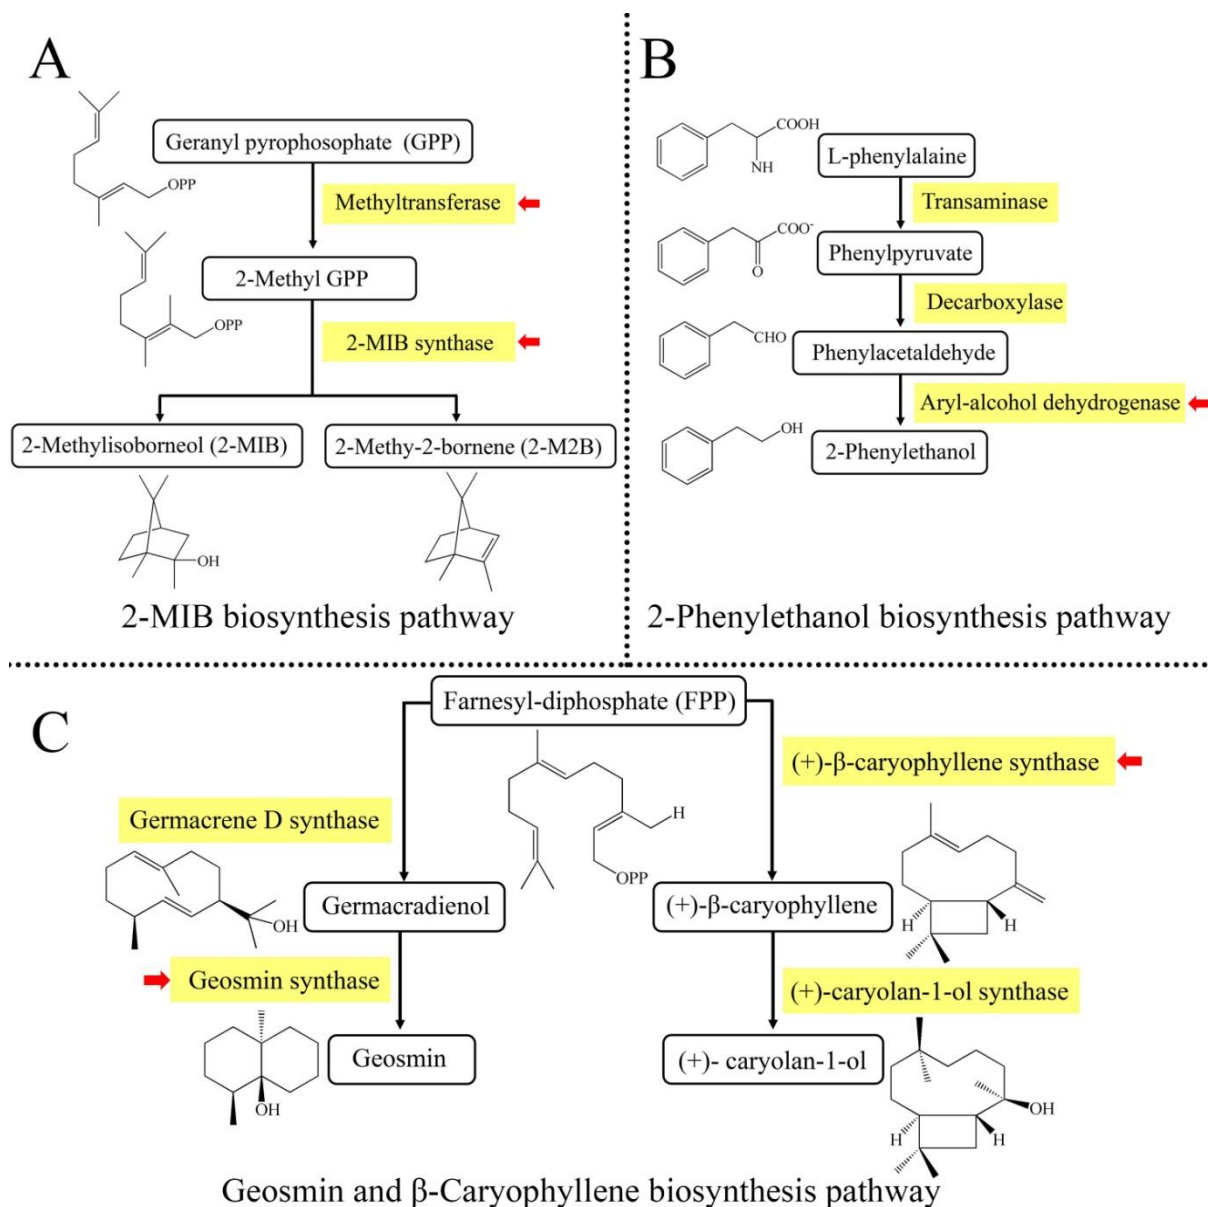

**Supplementary Figure S2.** Biosynthesis pathways of selected VOCs from *S. yanglinensis* 3-10.

The red arrows indicate the genes used for detection of expression by RT-PCR.

References for the biosynthesis pathways: **A**, from Komatsu et al. 2008. Proceedings of the National Academy of Sciences of the United States of America, 105: 7422-7427; **B**: from Zhang et al. 2014, BMC Biotechnology 14: 30; **C**, from Jiang et al. 2007. Nature Chemical Biology 3: 711-715; and Nakano et al. 2011. The Journal of Biological Chemistry 286: 27980-27987.

|                                             |                                          |     |
|---------------------------------------------|------------------------------------------|-----|
| <i>S. globisporus</i> TFH56 (WP_044368733)  | .....MPFCSAGGCFGLAKTREAAWAWABEGIL        | 30  |
| <i>S. fulvissimus</i> DSM 40593 (AGK80153)  | MSQITLFAFHMPPFSTGONPGLEKTRAAWAWABEGIL    | 40  |
| <i>S. cavourensis</i> TJ430 (WP_093751234)  | .....MPFASIGONPGLDKTRAAWAWABEGIL         | 30  |
| <i>Streptomyces</i> sp. SM18 (WP_103489563) | .....MPFASAGCONPGMENTAAAWAWABENDIRL      | 30  |
| <i>Streptomyces</i> sp. PgraA7 (SNB61248)   | MSQITLFAFHMPPFCSAGGCFGLAKTREAAWAWABEGIL  | 40  |
| <i>S. globisporus</i> C-1027(WP_029182233)  | .....MPFCSAGGCFGLPKTRAAWAWABEGIL         | 30  |
| <i>S. yanglinensis</i> 3-10 (MIK861975)     | .....MPFCSAGGCFGLPKTRAAWAWABEGIL         | 30  |
|                                             | mpf s gc pg t aaw wae l l                |     |
| <i>S. globisporus</i> TFH56 (WP_044368733)  | SVFARFKMTRTPELWISLIFFASQCHLDLFCQWLEWAF   | 70  |
| <i>S. fulvissimus</i> DSM 40593 (AGK80153)  | SVFARFKMTRTPELWISLIFFASQCHLDLFCQWLEWAF   | 80  |
| <i>S. cavourensis</i> TJ430 (WP_093751234)  | SVFARFKMTRTPELWISLIFFASQCHLDLFCQWLEWAF   | 70  |
| <i>Streptomyces</i> sp. SM18 (WP_103489563) | SEVARFKMTRTPELWISLIFFASQCHLDLFCQWLEWAF   | 70  |
| <i>Streptomyces</i> sp. PgraA7 (SNB61248)   | SVFARFKMTRTPELWISLIFFASQCHLDLFCQWLEWAF   | 80  |
| <i>S. globisporus</i> C-1027(WP_029182233)  | SVFARFKMTRTPELWISLIFFASQCHLDLFCQWLEWAF   | 70  |
| <i>S. yanglinensis</i> 3-10 (MIK861975)     | SVFARFKMTRTPELWISLIFFASQCHLDLFCQWLEWAF   | 70  |
|                                             | s ar km rtrpelwisliif asq hldlfcqwlwaf   |     |
| <i>S. globisporus</i> TFH56 (WP_044368733)  | LVDDEFDD:IPAGRNELMCEBAIRLVQVLDGAEENGEMBR | 110 |
| <i>S. fulvissimus</i> DSM 40593 (AGK80153)  | LVDDEFDD:IPAGRNELMCEBAIRLVQVLDGAEENGEMBR | 120 |
| <i>S. cavourensis</i> TJ430 (WP_093751234)  | LVDDEFDD:IPAGRNELMCEBAIRLVQVLDGAEENGEMBR | 110 |
| <i>Streptomyces</i> sp. SM18 (WP_103489563) | LVDDEFDD:IPAGRNELMCEBAIRLVQVLDGAEENGEMBR | 110 |
| <i>Streptomyces</i> sp. PgraA7 (SNB61248)   | LVDDEFDD:IPAGRNELMCEBAIRLVQVLDGAEENGEMBR | 120 |
| <i>S. globisporus</i> C-1027(WP_029182233)  | LVDDEFDD:IPAGRNELMCEBAIRLVQVLDGAEENGEMBR | 110 |
| <i>S. yanglinensis</i> 3-10 (MIK861975)     | LVDDEFDD:IPAGRNELMCEBAIRLVQVLDGAEENGEMBR | 110 |
|                                             | lvdddefdd:ipagr p mce ai rlv v dg p pme  |     |
|                                             | meta (Mg <sup>2+</sup> ) binding motif   |     |
| <i>S. globisporus</i> TFH56 (WP_044368733)  | SLGLRRTCTCPERSECWNRQFRRDTAAWLWYYAAEVERA  | 150 |
| <i>S. fulvissimus</i> DSM 40593 (AGK80153)  | SLGLRRTCTCPERSECWNRQFRRDTAAWLWYYAAEVERA  | 160 |
| <i>S. cavourensis</i> TJ430 (WP_093751234)  | SLGLRRTCTCPERSECWNRQFRRDTAAWLWYYAAEVERA  | 150 |
| <i>Streptomyces</i> sp. SM18 (WP_103489563) | SLGLRRTCTCPERSECWNRQFRRDTAAWLWYYAAEVERA  | 150 |
| <i>Streptomyces</i> sp. PgraA7 (SNB61248)   | SLGLRRTCTCPERSECWNRQFRRDTAAWLWYYAAEVERA  | 160 |
| <i>S. globisporus</i> C-1027(WP_029182233)  | SLGLRRTCTCPERSECWNRQFRRDTAAWLWYYAAEVERA  | 150 |
| <i>S. yanglinensis</i> 3-10 (MIK861975)     | SLGLRRTCTCPERSECWNRQFRRDTAAWLWYYAAEVERA  | 150 |
|                                             | l glr rtc rsp w rqfrrdtaawlwttyaaevera   |     |
| <i>S. globisporus</i> TFH56 (WP_044368733)  | AGQVFSRSBFARHRRDSVAMQPFLLHEITAEIDLHSAR   | 190 |
| <i>S. fulvissimus</i> DSM 40593 (AGK80153)  | AGQVFSRSBFARHRRDSVAMQPFLLHEITAEIDLHSAR   | 200 |
| <i>S. cavourensis</i> TJ430 (WP_093751234)  | AGQVFSRSBFARHRRDSVAMQPFLLHEITAEIDLHSAR   | 190 |
| <i>Streptomyces</i> sp. SM18 (WP_103489563) | AGQVFSRSBFARHRRDSVAMQPFLLHEITAEIDLHSAR   | 190 |
| <i>Streptomyces</i> sp. PgraA7 (SNB61248)   | AGQVFSRSBFARHRRDSVAMQPFLLHEITAEIDLHSAR   | 200 |
| <i>S. globisporus</i> C-1027(WP_029182233)  | AGQVFSRSBFARHRRDSVAMQPFLLHEITAEIDLHSAR   | 190 |
| <i>S. yanglinensis</i> 3-10 (MIK861975)     | AGQVFSRSBFARHRRDSVAMQPFLLHEITAEIDLHSAR   | 190 |
|                                             | agqvp r f hrrdsvamqpfll heita idlp sar   |     |
| <i>S. globisporus</i> TFH56 (WP_044368733)  | SLPAYIALRNVTDHSGLCNDICSEFEKAALGYEHNAVRL  | 230 |
| <i>S. fulvissimus</i> DSM 40593 (AGK80153)  | SLPAYIALRNVTDHSGLCNDICSEFEKAALGYEHNAVRL  | 240 |
| <i>S. cavourensis</i> TJ430 (WP_093751234)  | SLPAYIALRNVTDHSGLCNDICSEFEKAALGYEHNAVRL  | 230 |
| <i>Streptomyces</i> sp. SM18 (WP_103489563) | SLPAYIALRNVTDHSGLCNDICSEFEKAALGYEHNAVRL  | 230 |
| <i>Streptomyces</i> sp. PgraA7 (SNB61248)   | SLPAYIALRNVTDHSGLCNDICSEFEKAALGYEHNAVRL  | 240 |
| <i>S. globisporus</i> C-1027(WP_029182233)  | SLPAYIALRNVTDHSGLCNDICSEFEKAALGYEHNAVRL  | 230 |
| <i>S. yanglinensis</i> 3-10 (MIK861975)     | SLPAYIALRNVTDHSGLCNDICSEFEKAALGYEHNAVRL  | 230 |
|                                             | slpayialr avtdhsglcndicsfekeaalgyehnavrl |     |
| <i>S. globisporus</i> TFH56 (WP_044368733)  | IQRDRGCTLQCAVDEAGIQLARIAERVRABKELICEIDA  | 270 |
| <i>S. fulvissimus</i> DSM 40593 (AGK80153)  | IQRDRRSTLQCAVDEAGIQLARIAERVRABKELICEIDA  | 280 |
| <i>S. cavourensis</i> TJ430 (WP_093751234)  | IQRDRGCTLQCAVDEAGIQLARIAERVRABKELICEIDA  | 270 |
| <i>Streptomyces</i> sp. SM18 (WP_103489563) | IQRDRRSTLQCAVDEAGIQLARIAERVRABKELICEIDA  | 270 |
| <i>Streptomyces</i> sp. PgraA7 (SNB61248)   | IQRDRGCTLQCAVDEAGIQLARIAERVRABKELICEIDA  | 280 |
| <i>S. globisporus</i> C-1027(WP_029182233)  | IQRDRGCTLQCAVDEAGIQLARIAERVRABKELICEIDA  | 270 |
| <i>S. yanglinensis</i> 3-10 (MIK861975)     | IQRDRGCTLQCAVDEAGIQLARIAERVRABKELICEIDA  | 270 |
|                                             | iqdrdr ctq avdeagiqlariaerv rae el ei a  |     |
| <i>S. globisporus</i> TFH56 (WP_044368733)  | RGITGFTRAALERCVDYRGLVRGDFDYHARAERYTRFDL  | 310 |
| <i>S. fulvissimus</i> DSM 40593 (AGK80153)  | RGISASTRAALERCVDYRGLVRGDFDYHARAERYTRFDL  | 320 |
| <i>S. cavourensis</i> TJ430 (WP_093751234)  | RGISASTRAALERCVDYRGLVRGDFDYHARAERYTRFDL  | 310 |
| <i>Streptomyces</i> sp. SM18 (WP_103489563) | GGIEGFTRAALERCVDYRGLVRGDFDYHARAERYTRFDL  | 310 |
| <i>Streptomyces</i> sp. PgraA7 (SNB61248)   | RGITGFTRAALERCVDYRGLVRGDFDYHARAERYTRFDL  | 320 |
| <i>S. globisporus</i> C-1027(WP_029182233)  | RGITGFTRAALERCVDYRGLVRGDFDYHARAERYTRFDL  | 310 |
| <i>S. yanglinensis</i> 3-10 (MIK861975)     | RGITGFTRAALERCVDYRGLVRGDFDYHARAERYTRFDL  | 310 |
|                                             | gi raalercv dyr lvrqdfdyharaerytrpdl     |     |
| <i>S. globisporus</i> TFH56 (WP_044368733)  | VELDERDSLSQFA                            | 324 |
| <i>S. fulvissimus</i> DSM 40593 (AGK80153)  | VELDARNSSQFA                             | 334 |
| <i>S. cavourensis</i> TJ430 (WP_093751234)  | VEREARNSSQFA                             | 324 |
| <i>Streptomyces</i> sp. SM18 (WP_103489563) | VEIDRRZALSQFA                            | 324 |
| <i>Streptomyces</i> sp. PgraA7 (SNB61248)   | VELDERDSLSQFA                            | 334 |
| <i>S. globisporus</i> C-1027(WP_029182233)  | VELDERDSLSQFA                            | 324 |
| <i>S. yanglinensis</i> 3-10 (MIK861975)     | VELDERDSLSQFA                            | 324 |
|                                             | ve r s fa                                |     |

**Supplementary Figure S3. (+)-beta-Caryophyllene synthase AA sequence alignment**

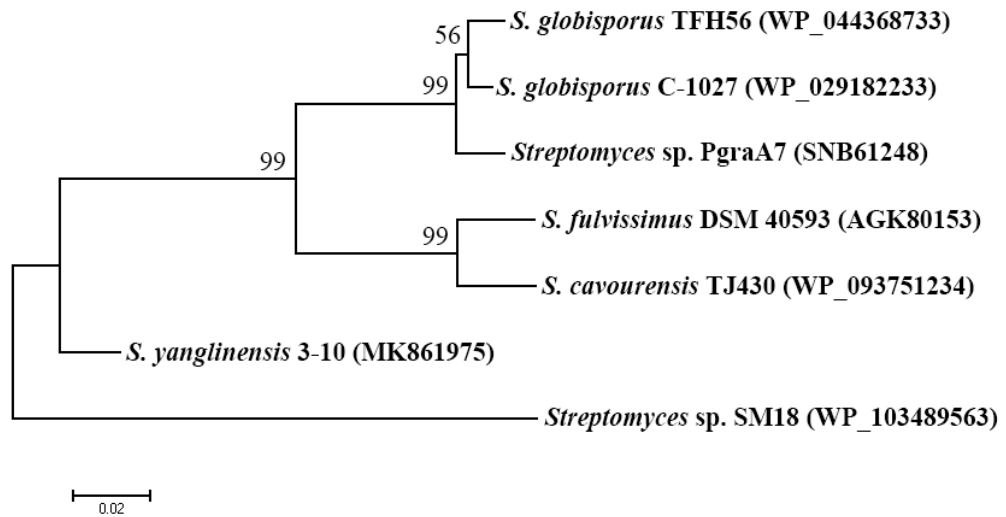

**Supplementary Figure S4.** A phylogenetic tree based on AA sequence of (+)-beta-caryophyllene synthase using the maximum likelihood method. The numbers at the nodes in that tree indicate the bootstrap percentages ( $n = 1,000$ ). The bar indicates the average nucleotide change per site.

|                                                   |                                          |     |
|---------------------------------------------------|------------------------------------------|-----|
| <i>Streptomyces</i> sp. MK-45 (WP_126398064)      | .....MSTSSPT...SLGPFNLSLIF               | 20  |
| <i>S. lincolnensis</i> LC-G (WP_107406541)        | .....MRTSR                               | 5   |
| <i>S. griseorubiginosus</i> 3E-1 (WP_062242203)   | .....MTATSSR...SLGPFPIASRLR              | 20  |
| <i>S. lydicus</i> 103 (WP_069571074)              | .....MSTFPHTTAGTFLGPFPIASPAFR            | 24  |
| <i>Streptomyces</i> sp. NEAU-S7GS2 (WP_109889928) | .....MSTFPNTAAAFSLGPFNLTATLR             | 24  |
| <i>S. yanglinensis</i> CGMCC (SEG55725)           | .MEQDPATEFAAAEPDFGAGTGPARNVFPGEAGIFPAP   | 39  |
| <i>S. yanglinensis</i> 3-10 (MK861971)            | VTAAEDRVEHPARTSPGTFRFPARPARLFLGPFSLPRSA  | 40  |
| <i>Streptomyces</i> sp. MK-45 (WP_126398064)      | .ARRGGALFGLRYGCVLFDDEFAAEVDRLEPWARRLDL   | 59  |
| <i>S. lincolnensis</i> LC-G (WP_107406541)        | ARR.GGELFGIRHFAVEFDEDFVDFDRLEPWARGLDL    | 44  |
| <i>S. griseorubiginosus</i> 3E-1 (WP_062242203)   | TPRRGGAIFGLRYGCVLFDDEFAAEVDRLEPWARRLDL   | 60  |
| <i>S. lydicus</i> 103 (WP_069571074)              | NRR.GGAVPGLRYGFAFDFDFKVRDFDRLEPWARRLDL   | 63  |
| <i>Streptomyces</i> sp. NEAU-S7GS2 (WP_109889928) | TRPPGGAVPGLRYGFAFDFDFKVRDFDRLEPWARRLDL   | 64  |
| <i>S. yanglinensis</i> CGMCC (SEG55725)           | ARR.TGAVPGLRYGFAFDFDFKVRDFDRLEPWARRLDL   | 78  |
| <i>S. yanglinensis</i> 3-10 (MK861971)            | ARR.TGALFGLTYFAVTFDFDFKVAEVDRLPWARRLDL   | 79  |
|                                                   | g pg r p dp k e d rle wa ldl             |     |
| <i>Streptomyces</i> sp. MK-45 (WP_126398064)      | FEAPWSGDSGGQFGRVAVLQHEGAADLRRLTRAGLLLA   | 99  |
| <i>S. lincolnensis</i> LC-G (WP_107406541)        | FEAPWSGDSGGQFGRVAVLQHEGAADLRRLTRAGLLLA   | 84  |
| <i>S. griseorubiginosus</i> 3E-1 (WP_062242203)   | FEAPWSGDSGGQFGRVAVLQHEGAADLRRLTRAGLLLA   | 100 |
| <i>S. lydicus</i> 103 (WP_069571074)              | FEAPWSGDSGGQFGRVAVLQHEGAADLRRLTRAGLLLA   | 103 |
| <i>Streptomyces</i> sp. NEAU-S7GS2 (WP_109889928) | FEAPWSGDSGGQFGRVAVLQHEGAADLRRLTRAGLLLA   | 104 |
| <i>S. yanglinensis</i> CGMCC (SEG55725)           | FEAPWSGDSGGQFGRVAVLQHEGAADLRRLTRAGLLLA   | 118 |
| <i>S. yanglinensis</i> 3-10 (MK861971)            | FETAWTGDHAGQFGRVAVLQHEGAADLRRLTRAGLLLA   | 119 |
|                                                   | fp w gdf fqfgravvlqhp aadl rlt ag llla   |     |
| <i>Streptomyces</i> sp. MK-45 (WP_126398064)      | ENVVDSYCYEEDFGRGARRGLGGLIMAGSALDFVEGIF   | 139 |
| <i>S. lincolnensis</i> LC-G (WP_107406541)        | ENVVDSYCYEEDFGRGARRGLGGLIMAGSALDFVEGIF   | 124 |
| <i>S. griseorubiginosus</i> 3E-1 (WP_062242203)   | ENVVDSYCYEEDFGRGARRGLGGLIMAGSALDFVEGIF   | 140 |
| <i>S. lydicus</i> 103 (WP_069571074)              | ENVVDSYCYEEDFGRGARRGLGGLIMAGSALDFVEGIF   | 143 |
| <i>Streptomyces</i> sp. NEAU-S7GS2 (WP_109889928) | ENVVDSYCYEEDFGRGARRGLGGLIMAGSALDFVEGIF   | 144 |
| <i>S. yanglinensis</i> CGMCC (SEG55725)           | ENVVDSYCYEEDFGRGARRGLGGLIMAGSALDFVEGIF   | 158 |
| <i>S. yanglinensis</i> 3-10 (MK861971)            | ENVVDSYCYEEDFGRGARRGLGGLIMAGSALDFVEGIF   | 159 |
|                                                   | en hv cycee a g rglgg li aq a dp h       |     |
|                                                   | metal (Mg <sup>2+</sup> )-binding motif  |     |
| <i>Streptomyces</i> sp. MK-45 (WP_126398064)      | ETEEWREGVADGFLRSYHVALDYAATATPSCIDRFVH    | 179 |
| <i>S. lincolnensis</i> LC-G (WP_107406541)        | ATEACWREGVADGFLRSYHVALDYAATATPSCIDRFVH   | 164 |
| <i>S. griseorubiginosus</i> 3E-1 (WP_062242203)   | ETEEWREGVADGFLRSYHVALDYAATATPSCIDRFVH    | 180 |
| <i>S. lydicus</i> 103 (WP_069571074)              | ETEEWREGVADGFLRSYHVALDYAATATPSCIDRFVH    | 183 |
| <i>Streptomyces</i> sp. NEAU-S7GS2 (WP_109889928) | ETEEWREGVADGFLRSYHVALDYAATATPSCIDRFVH    | 184 |
| <i>S. yanglinensis</i> CGMCC (SEG55725)           | ETEEWREGVADGFLRSYHVALDYAATATPSCIDRFVH    | 198 |
| <i>S. yanglinensis</i> 3-10 (MK861971)            | ETEEWREGVADGFLRSYHVALDYAATATPSCIDRFVH    | 199 |
|                                                   | e wr g adgplrsyh a dya atpsq rfv         |     |
| <i>Streptomyces</i> sp. MK-45 (WP_126398064)      | DIARLHLGYLAEAAWETIRYVETVWEYLVMRQFNNFRPCL | 219 |
| <i>S. lincolnensis</i> LC-G (WP_107406541)        | DIARLHLGYLAEAAWETIRYVETVWEYLVMRQFNNFRPCL | 204 |
| <i>S. griseorubiginosus</i> 3E-1 (WP_062242203)   | DIARLHLGYLAEAAWETIRYVETVWEYLVMRQFNNFRPCL | 220 |
| <i>S. lydicus</i> 103 (WP_069571074)              | DIARLHLGYLAEAAWETIRYVETVWEYLVMRQFNNFRPCL | 223 |
| <i>Streptomyces</i> sp. NEAU-S7GS2 (WP_109889928) | DIARLHLGYLAEAAWETIRYVETVWEYLVMRQFNNFRPCL | 224 |
| <i>S. yanglinensis</i> CGMCC (SEG55725)           | DIARLHLGYLAEAAWETIRYVETVWEYLVMRQFNNFRPCL | 238 |
| <i>S. yanglinensis</i> 3-10 (MK861971)            | DIARLHLGYLAEAAWETIRYVETVWEYLVMRQFNNFRPCL | 239 |
|                                                   | diarlhlgylaeaaaw e p vweylvmrqfnnfrpcl   |     |
| <i>Streptomyces</i> sp. MK-45 (WP_126398064)      | SIVDAVDGYELFEAVYRPEIQRTALACNATTIVNDLYS   | 259 |
| <i>S. lincolnensis</i> LC-G (WP_107406541)        | SIVDAVDGYELFEAVYRPEIQRTALACNATTIVNDLYS   | 244 |
| <i>S. griseorubiginosus</i> 3E-1 (WP_062242203)   | SIVDAVDGYELFEALYRPEIQRTALACNATTIVNDLYS   | 260 |
| <i>S. lydicus</i> 103 (WP_069571074)              | SIVDAVDGYELFEALYRPEIQRTALACNATTIVNDLYS   | 263 |
| <i>Streptomyces</i> sp. NEAU-S7GS2 (WP_109889928) | SIVDAVDGYELFEALYRPEIQRTALACNATTIVNDLYS   | 264 |
| <i>S. yanglinensis</i> CGMCC (SEG55725)           | SIVDAVDGYELFEAVHVRPEIQRTALACNATTIVNDLYS  | 278 |
| <i>S. yanglinensis</i> 3-10 (MK861971)            | SIVDAVDGYELFEALYRPEIQRTALACNATTIVNDLYS   | 279 |
|                                                   | siwda dgyel fe rpe qr tala natt vndlys   |     |
|                                                   | metal (Mg <sup>2+</sup> )-binding motif  |     |
| <i>Streptomyces</i> sp. MK-45 (WP_126398064)      | FTEELASDTHLNLFQVAAANERGLKAYLRSVEIHNCI    | 299 |
| <i>S. lincolnensis</i> LC-G (WP_107406541)        | FTEELASDTHLNLFQVAAANERGLKAYLRSVEIHNCI    | 284 |
| <i>S. griseorubiginosus</i> 3E-1 (WP_062242203)   | FTEELASDTHLNLFQVAAANERGLKAYLRSVEIHNCI    | 300 |
| <i>S. lydicus</i> 103 (WP_069571074)              | FTEELASDTHLNLFQVAAANERGLKAYLRSVEIHNCI    | 303 |
| <i>Streptomyces</i> sp. NEAU-S7GS2 (WP_109889928) | FTEELASDTHLNLFQVAAANERGLKAYLRSVEIHNCI    | 304 |
| <i>S. yanglinensis</i> CGMCC (SEG55725)           | FTEELASDTHLNLFQVAAANERGLKAYLRSVEIHNCI    | 318 |
| <i>S. yanglinensis</i> 3-10 (MK861971)            | FTEELASDTHLNLFQVAAANERGLKAYLRSVEIHNCI    | 319 |
|                                                   | ft el dp hlnlp v aan glk ayl rveihn i    |     |
| <i>Streptomyces</i> sp. MK-45 (WP_126398064)      | MESFEESALISASFLVBRYSISLWVGNHWEHTNT       | 339 |
| <i>S. lincolnensis</i> LC-G (WP_107406541)        | MDTFEEEPATISASFLVBRYSISLWVGNHWEHTNT      | 324 |
| <i>S. griseorubiginosus</i> 3E-1 (WP_062242203)   | MAAFTEESALISASFLVBRYSISLWVGNHWEHTNT      | 340 |
| <i>S. lydicus</i> 103 (WP_069571074)              | MEAFETESALISASFLVBRYSISLWVGNHWEHTNT      | 343 |
| <i>Streptomyces</i> sp. NEAU-S7GS2 (WP_109889928) | MEAFETESALISASFLVBRYSISLWVGNHWEHTNT      | 344 |
| <i>S. yanglinensis</i> CGMCC (SEG55725)           | MDSEEEEPALISASFLVGRYARGISLWVGNHWEHTNT    | 358 |
| <i>S. yanglinensis</i> 3-10 (MK861971)            | MASFEEEPALISASFLVGRYARGISLWVGNHWEHTNT    | 359 |
|                                                   | m f a l a sp ry l wv gnheht nt           |     |
| <i>Streptomyces</i> sp. MK-45 (WP_126398064)      | FRYELPNY                                 | 347 |
| <i>S. lincolnensis</i> LC-G (WP_107406541)        | FRYELPNY                                 | 332 |
| <i>S. griseorubiginosus</i> 3E-1 (WP_062242203)   | FRYELPNY                                 | 348 |
| <i>S. lydicus</i> 103 (WP_069571074)              | DRYCLPNY                                 | 351 |
| <i>Streptomyces</i> sp. NEAU-S7GS2 (WP_109889928) | DRYCLPNY                                 | 352 |
| <i>S. yanglinensis</i> CGMCC (SEG55725)           | FRYELPNY                                 | 366 |
| <i>S. yanglinensis</i> 3-10 (MK861971)            | FRYELPNY                                 | 367 |
|                                                   | zy lpnpy                                 |     |

**Supplementary Figure S5.** Alignment of the amino acid sequences of 2-MIB synthase in *Streptomyces* species

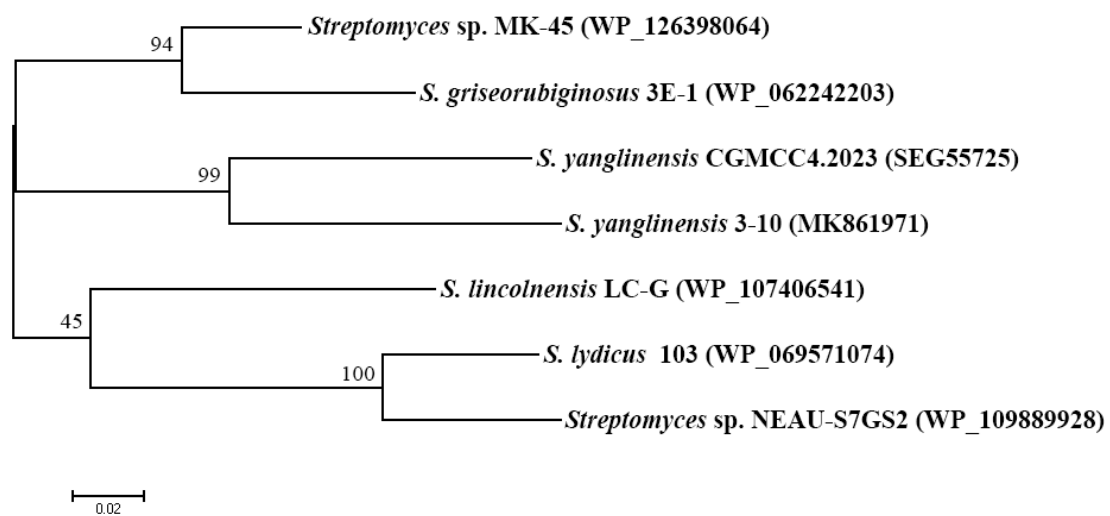

**Supplementary Figure S6.** A phylogenetic tree inferred based on the amino acid sequences of 2-MIB synthase in *Streptomyces* using the maximum likelihood method. The numbers at the nodes in that tree indicate the bootstrap percentages ( $n = 1,000$ ). The bar indicates the average nucleotide change per site.

|                                                   |                                             |     |
|---------------------------------------------------|---------------------------------------------|-----|
| <i>Streptomyces</i> sp. NEAU-S7GS2 (WP_109889930) | ..MTITHADIAITFVETQSTYQSRVADYWNFEENPVNLRL    | 38  |
| <i>S. lincolnensis</i> LC-G (WP_067426235)        | ..MTITADAVITTAFFVETQSTYQNRVADYWNFEENPVNLRL  | 38  |
| <i>Streptomyces</i> sp. MK-45 (WP_126398061)      | MTIAFEAGTSTAVFVESQSTYQTRVADYWNFEENPVNLRL    | 40  |
| <i>Streptomyces</i> sp. ZFG47 (WP_112440588)      | ..MTIAHAGTTTAPVETQSTYQNRVADYWNFEENPVNLRL    | 38  |
| <i>Streptomyces</i> sp. CNQ-509 (WP_047016551)    | ...MAAADTNVLTSE...YQHSIADYWNFEERIPVNLRL     | 33  |
| <i>S. yanglinensis</i> CGMCC4.2023 (WP_103886496) | ..MTIQHFGTSTAFVETQSTYQTRVADYWNFEENPVNLRL    | 38  |
| <i>S. yanglinensis</i> 3-10 (MK861972)            | ..LITTHRGTTTAPVEAQSTYQTRVADYWNFEENPVNLRL    | 38  |
|                                                   | p yq adywn e pvnrl l                        |     |
| <i>Streptomyces</i> sp. NEAU-S7GS2 (WP_109889930) | GKIDDLYHHHYGIGEDRSVLNEFDGRRRLRVIGELHRL      | 78  |
| <i>S. lincolnensis</i> LC-G (WP_067426235)        | GKIDDLYHHHYGIGDVLLAVLDYEDFVRRRLRITZELHRL    | 78  |
| <i>Streptomyces</i> sp. MK-45 (WP_126398061)      | GKIDDLYHHHYGIGDADRSVLDEDFVRRRLRITZELHRL     | 80  |
| <i>Streptomyces</i> sp. ZFG47 (WP_112440588)      | GKIDDLYHHHYGIGDVLDVDSVLDEEDRARRRRLRVIGELHRL | 78  |
| <i>Streptomyces</i> sp. CNQ-509 (WP_047016551)    | GIDVSGTYHHHYGIGEDVLSVLGGFEE.TRGERRIIPEMHRL  | 72  |
| <i>S. yanglinensis</i> CGMCC4.2023 (WP_103886496) | GKIDDLYHHHYGIGEDVLSVLDETDPAIRRLRITZELHRL    | 78  |
| <i>S. yanglinensis</i> 3-10 (MK861972)            | GKIDDLYHHHYGIGEDRSVLDEDFPAIRRLRITZELHRL     | 78  |
|                                                   | g yhhhyg g d vl r r e hrl                   |     |
| <i>Streptomyces</i> sp. NEAU-S7GS2 (WP_109889930) | BHAQAELLASRLGDLSPFTDRVFDAGCGRGGSVVVHLRNG    | 118 |
| <i>S. lincolnensis</i> LC-G (WP_067426235)        | BHAQAELLASRLGPLSPFGDVFVDAGCGRGGSVVVHLRNG    | 118 |
| <i>Streptomyces</i> sp. MK-45 (WP_126398061)      | BHAQAELLADRLGPLTPDDRVDAGCGRGGSVVVHLRNG      | 120 |
| <i>Streptomyces</i> sp. ZFG47 (WP_112440588)      | BHAQAELLAGHLGPLTPADRVFDAGCGRGGSVVVHLRNG     | 118 |
| <i>Streptomyces</i> sp. CNQ-509 (WP_047016551)    | ETAQATLLLDHLGEPDRGRRLDAGSGRGGSVFVAHERNG     | 112 |
| <i>S. yanglinensis</i> CGMCC4.2023 (WP_103886496) | BHAQAELLASRLGPLTSADRVFDAGCGRGGSVVVHLRNG     | 118 |
| <i>S. yanglinensis</i> 3-10 (MK861972)            | BHAQAELLASRLGPLTPADRVFDAGCGRGGSVVVHLRNG     | 118 |
|                                                   | e aqa ll lg r dag grgg s a r g              |     |
| <i>Streptomyces</i> sp. NEAU-S7GS2 (WP_109889930) | CHADGATTSARCAADFANQARRRGIDDKVRHHRNMLDTG     | 158 |
| <i>S. lincolnensis</i> LC-G (WP_067426235)        | CEADGVTTISARCAEFANQARRRGIDDLVRHHRNMLDTG     | 158 |
| <i>Streptomyces</i> sp. MK-45 (WP_126398061)      | CEADGVTTISARCAEFANQARRRGIGDQVRHHRNMLDTG     | 160 |
| <i>Streptomyces</i> sp. ZFG47 (WP_112440588)      | CHADGVTTISARCAADFANQARRRGIDEQVRHHRNMLDTG    | 158 |
| <i>Streptomyces</i> sp. CNQ-509 (WP_047016551)    | CRVDGISISQSQVSFANDCVQRRGLGSVVRHHRNMLDTG     | 152 |
| <i>S. yanglinensis</i> CGMCC4.2023 (WP_103886496) | CSADGVTTISARCAEFANQARRRGIDGKVRHHRNMLDTG     | 158 |
| <i>S. yanglinensis</i> 3-10 (MK861972)            | CSADGVTTISARCAEFANQARRRGIDGKVRHHRNMLDTG     | 158 |
|                                                   | c dg s q fan q rg vr h nmldtg               |     |
| <i>Streptomyces</i> sp. NEAU-S7GS2 (WP_109889930) | FTTGAYAAASWNNESTMYVELDILFAEHARLLRGGRYVTI    | 198 |
| <i>S. lincolnensis</i> LC-G (WP_067426235)        | LPSCAFAAASWNNESTMYVELDILFAEHARLLRGGRYAVI    | 198 |
| <i>Streptomyces</i> sp. MK-45 (WP_126398061)      | LPSCAFAAASWNNESTMYVELDILFAEHARLLRGGRYVTI    | 200 |
| <i>Streptomyces</i> sp. ZFG47 (WP_112440588)      | FTTGAYAAASWNNESTMYVELDILFAEHARLLRGGRYVVI    | 198 |
| <i>Streptomyces</i> sp. CNQ-509 (WP_047016551)    | FETGAFRGIWNNESTMYVELAQLKEHARLLRGGRYVTI      | 192 |
| <i>S. yanglinensis</i> CGMCC4.2023 (WP_103886496) | FSTGGYAAASWNNESTMYVELDILFAEHARLLRGGRYVVI    | 198 |
| <i>S. yanglinensis</i> 3-10 (MK861972)            | FRTEGYTASWNNESTMYVELDILFAEHARLLRGGRYVTI     | 198 |
|                                                   | g wnnestmyvel lf eharll rggr y i            |     |
| <i>Streptomyces</i> sp. NEAU-S7GS2 (WP_109889930) | TGCYNDYGRASREVSINAHYICDHPRSYFRAMARNR        | 238 |
| <i>S. lincolnensis</i> LC-G (WP_067426235)        | TGCYNDYGRASREVSINAHYICDHPRSYFRAMARNR        | 238 |
| <i>Streptomyces</i> sp. MK-45 (WP_126398061)      | TGCYNDYGRASREVSINAHYICDHPRSYFRAMARNR        | 240 |
| <i>Streptomyces</i> sp. ZFG47 (WP_112440588)      | TGCYNDYGRASREVSINAHYICDHPRSYFRAMARNR        | 238 |
| <i>Streptomyces</i> sp. CNQ-509 (WP_047016551)    | TGCYNDYGLSRAVSCINAHYICNVHPRSIFYFELIVANR     | 232 |
| <i>S. yanglinensis</i> CGMCC4.2023 (WP_103886496) | TGCYNDYGRASREVSINAHYICDHPRSYFRAMARNR        | 238 |
| <i>S. yanglinensis</i> 3-10 (MK861972)            | TGCYNDYGRASREVSINAHYICDHPRSYFRAMARNR        | 238 |
|                                                   | tgcynd yg sr vs inahyic hprs yf nr          |     |
| <i>Streptomyces</i> sp. NEAU-S7GS2 (WP_109889930) | LVPVHVVDLTAAAPYWELRQADHLVTGDEDTFLTAYRN      | 278 |
| <i>S. lincolnensis</i> LC-G (WP_067426235)        | LVPVHVVDLTAAAPYWELRQADHLVTGDEDTFLTAYRN      | 278 |
| <i>Streptomyces</i> sp. MK-45 (WP_126398061)      | LVPVHVVDLTATIPYWELRQADHLVTGDEDTFLTAYRN      | 280 |
| <i>Streptomyces</i> sp. ZFG47 (WP_112440588)      | LVPVHVVDLTATIPYWELRSQADHLVTGDEDTFLTAYRN     | 278 |
| <i>Streptomyces</i> sp. CNQ-509 (WP_047016551)    | LVPVHVVDLTATIPYWELRAKSS.VATGDEVEFLTAYRS     | 271 |
| <i>S. yanglinensis</i> CGMCC4.2023 (WP_103886496) | LVPVHVVDLTAAAPYWELRQDAEHLVTGDEDTFLTAYRN     | 278 |
| <i>S. yanglinensis</i> 3-10 (MK861972)            | LVPVHVVDLTATIPYWELRQAEHLVTGDEDTFLTAYRN      | 278 |
|                                                   | lvp v dlt pywelr tg e f ayr                 |     |
| <i>Streptomyces</i> sp. NEAU-S7GS2 (WP_109889930) | GSFQYLLITAIR                                | 290 |
| <i>S. lincolnensis</i> LC-G (WP_067426235)        | GSFQYLLITAIR                                | 290 |
| <i>Streptomyces</i> sp. MK-45 (WP_126398061)      | GSFQYLLITAIR                                | 292 |
| <i>Streptomyces</i> sp. ZFG47 (WP_112440588)      | GSFQYLLITAIR                                | 290 |
| <i>Streptomyces</i> sp. CNQ-509 (WP_047016551)    | GSFQYLLITAIR                                | 283 |
| <i>S. yanglinensis</i> CGMCC4.2023 (WP_103886496) | GSFQYLLITAIR                                | 290 |
| <i>S. yanglinensis</i> 3-10 (MK861972)            | GSFQYLLITAIR                                | 290 |
|                                                   | gsfqyl i a r                                |     |

**Supplementary Figure S7.** Methyltransferase AA sequence alignment

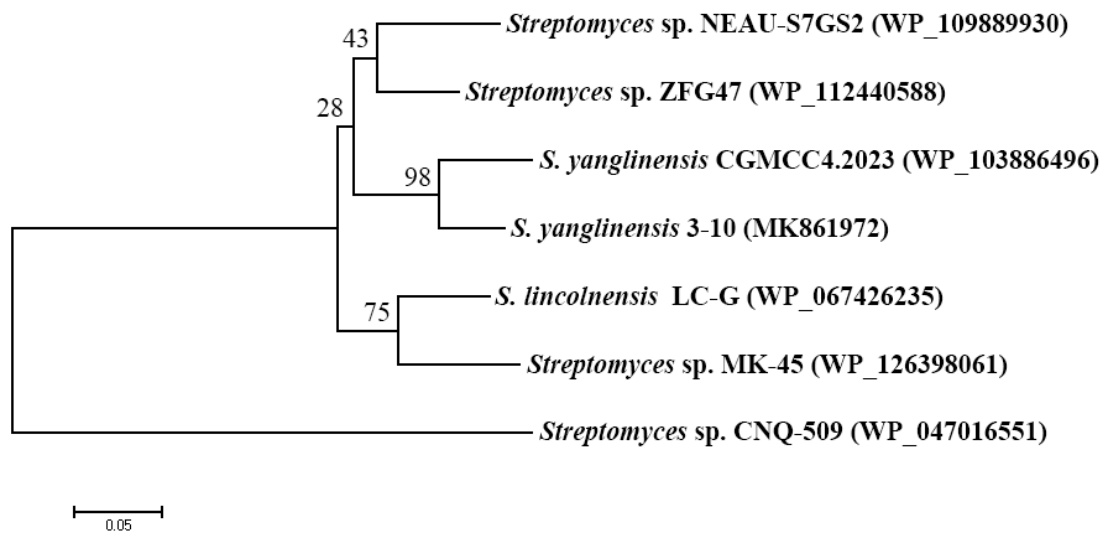

**Supplementary Figure S8.** A phylogenetic tree based on AA sequence of methyltransferase using the maximum likelihood method. The numbers at the nodes in that tree indicate the bootstrap percentages ( $n = 1,000$ ). The bar indicates the average nucleotide change per site.

|                                                       |                                                      |     |                                                       |                                                           |     |
|-------------------------------------------------------|------------------------------------------------------|-----|-------------------------------------------------------|-----------------------------------------------------------|-----|
| <i>S. albiflavus</i> MDJK44 (WP_087886527)            | MFQFSRFFELFFVHVPARLNHTEGARRRRENNRNG                  | 40  | <i>S. albiflavus</i> MDJK44 (WP_087886527)            | FSVITDFDITITLISHFASREVVEARRRMLFQCF                        | 418 |
| <i>S. luteovercillatus</i> CGMCC 15060 (WP_126912889) | ...NPNFFELFFETEPARLNHTEGARRRRENNRNG                  | 37  | <i>S. luteovercillatus</i> CGMCC 15060 (WP_126912889) | FLRFRDFEFQTRRNHTEARRHGVARRITITVEFS                        | 418 |
| <i>Streptomyces</i> sp. MOE7 (WP_084772522)           | ...NTPFFELFFETEPARLNHTEGARRRRENNRNG                  | 37  | <i>Streptomyces</i> sp. MOE7 (WP_084772522)           | FSRIFDFCFEFTLSHTEGARRRVLDACRRQIQCF                        | 419 |
| <i>Streptomyces</i> sp. SC5IO 03032 (WP_086159477)    | ...NTPFFELFFETEPARLNHTEGARRRRENNRNG                  | 37  | <i>Streptomyces</i> sp. SC5IO 03032 (WP_086159477)    | FSLIDFPHFLRLRNHTEGARRRLARRITIDGAR                         | 437 |
| <i>S. seoulensis</i> KCTC 9819 (WP_031181672)         | ...NTPFFELFFETEPARLNHTEGARRRRENNRNG                  | 37  | <i>S. seoulensis</i> KCTC 9819 (WP_031181672)         | ESLIDFPHFLRLRNHTEGARRRLARRITIDGAR                         | 419 |
| <i>S. yanglinensis</i> CGMCC4.2023 (WP_103883902)     | ...NTPFFELFFETEPARLNHTEGARRRRENNRNG                  | 37  | <i>S. yanglinensis</i> CGMCC4.2023 (WP_103883902)     | EVERRPFVDFEFTLISHFASRRHVLADGRMLDDE                        | 417 |
| <i>S. yanglinensis</i> 3-10 (MK861973)                | ...NTPFFELFFETEPARLNHTEGARRRRENNRNG                  | 37  | <i>S. yanglinensis</i> 3-10 (MK861973)                | WVRARFVDFEFTLISHFASRRHVLADGRMLDDE                         | 417 |
|                                                       | pfelip fy parlnh ar h wa m                           |     |                                                       | p h r w g                                                 |     |
| <i>S. albiflavus</i> MDJK44 (WP_087886527)            | MFGSGVDTAQLDHYDILLOLYTHPFCDSAGSLVTDN                 | 80  | <i>S. albiflavus</i> MDJK44 (WP_087886527)            | GVFASH...TKARKLAGVTHPFCDSAGSLVTDN                         | 457 |
| <i>S. luteovercillatus</i> CGMCC 15060 (WP_126912889) | MFGSGVDTAQLDHYDILLOLYTHPFCDSAGSLVTDN                 | 77  | <i>S. luteovercillatus</i> CGMCC 15060 (WP_126912889) | GVFASH...TKARKLAGVTHPFCDSAGSLVTDN                         | 457 |
| <i>Streptomyces</i> sp. MOE7 (WP_084772522)           | MFGSGVDTAQLDHYDILLOLYTHPFCDSAGSLVTDN                 | 77  | <i>Streptomyces</i> sp. MOE7 (WP_084772522)           | GVFASH...TKARKLAGVTHPFCDSAGSLVTDN                         | 458 |
| <i>Streptomyces</i> sp. SC5IO 03032 (WP_086159477)    | MFGSGVDTAQLDHYDILLOLYTHPFCDSAGSLVTDN                 | 77  | <i>Streptomyces</i> sp. SC5IO 03032 (WP_086159477)    | GVFASH...TKARKLAGVTHPFCDSAGSLVTDN                         | 469 |
| <i>S. seoulensis</i> KCTC 9819 (WP_031181672)         | MFGSGVDTAQLDHYDILLOLYTHPFCDSAGSLVTDN                 | 77  | <i>S. seoulensis</i> KCTC 9819 (WP_031181672)         | GVFASH...TKARKLAGVTHPFCDSAGSLVTDN                         | 445 |
| <i>S. yanglinensis</i> CGMCC4.2023 (WP_103883902)     | MFGSGVDTAQLDHYDILLOLYTHPFCDSAGSLVTDN                 | 77  | <i>S. yanglinensis</i> CGMCC4.2023 (WP_103883902)     | GVFASH...TKARKLAGVTHPFCDSAGSLVTDN                         | 457 |
| <i>S. yanglinensis</i> 3-10 (MK861973)                | MFGSGVDTAQLDHYDILLOLYTHPFCDSAGSLVTDN                 | 77  | <i>S. yanglinensis</i> 3-10 (MK861973)                | GVFASH...TKARKLAGVTHPFCDSAGSLVTDN                         | 457 |
|                                                       | m e a g w hdy llo ythpd l tdw                        |     |                                                       | w d l g a g p ld                                          |     |
| <i>S. albiflavus</i> MDJK44 (WP_087886527)            | YVWVFVDFDIFAREPRCTIGARARLDREPFHMLD                   | 120 | <i>S. albiflavus</i> MDJK44 (WP_087886527)            | WLVWVDFDIFAREPRCTIGARARLDREPFHMLD                         | 496 |
| <i>S. luteovercillatus</i> CGMCC 15060 (WP_126912889) | YVWVFVDFDIFAREPRCTIGARARLDREPFHMLD                   | 117 | <i>S. luteovercillatus</i> CGMCC 15060 (WP_126912889) | WLVWVDFDIFAREPRCTIGARARLDREPFHMLD                         | 497 |
| <i>Streptomyces</i> sp. MOE7 (WP_084772522)           | YVWVFVDFDIFAREPRCTIGARARLDREPFHMLD                   | 117 | <i>Streptomyces</i> sp. MOE7 (WP_084772522)           | WLVWVDFDIFAREPRCTIGARARLDREPFHMLD                         | 497 |
| <i>Streptomyces</i> sp. SC5IO 03032 (WP_086159477)    | YVWVFVDFDIFAREPRCTIGARARLDREPFHMLD                   | 117 | <i>Streptomyces</i> sp. SC5IO 03032 (WP_086159477)    | WLVWVDFDIFAREPRCTIGARARLDREPFHMLD                         | 508 |
| <i>S. seoulensis</i> KCTC 9819 (WP_031181672)         | YVWVFVDFDIFAREPRCTIGARARLDREPFHMLD                   | 117 | <i>S. seoulensis</i> KCTC 9819 (WP_031181672)         | WLVWVDFDIFAREPRCTIGARARLDREPFHMLD                         | 494 |
| <i>S. yanglinensis</i> CGMCC4.2023 (WP_103883902)     | YVWVFVDFDIFAREPRCTIGARARLDREPFHMLD                   | 117 | <i>S. yanglinensis</i> CGMCC4.2023 (WP_103883902)     | WLVWVDFDIFAREPRCTIGARARLDREPFHMLD                         | 496 |
| <i>S. yanglinensis</i> 3-10 (MK861973)                | YVWVFVDFDIFAREPRCTIGARARLDREPFHMLD                   | 117 | <i>S. yanglinensis</i> 3-10 (MK861973)                | WLVWVDFDIFAREPRCTIGARARLDREPFHMLD                         | 496 |
|                                                       | yvwvff d f i f r d k d g v g h y l d r e p f h m l d |     |                                                       | w l w g v y d f i f r d k d g v g h y l d r e p f h m l d |     |
|                                                       | meta (Mg <sup>2+</sup> ) binding motif               |     |                                                       | meta (Mg <sup>2+</sup> ) binding motif                    |     |
| <i>S. albiflavus</i> MDJK44 (WP_087886527)            | TEHPEHNVAGLADLRTVHGSGHRRARRRRL                       | 160 | <i>S. albiflavus</i> MDJK44 (WP_087886527)            | C.SPTFFANALRTVHGSGHRRARRRRL                               | 535 |
| <i>S. luteovercillatus</i> CGMCC 15060 (WP_126912889) | TEHPEHNVAGLADLRTVHGSGHRRARRRRL                       | 157 | <i>S. luteovercillatus</i> CGMCC 15060 (WP_126912889) | C.SPTFFANALRTVHGSGHRRARRRRL                               | 536 |
| <i>Streptomyces</i> sp. MOE7 (WP_084772522)           | TEHPEHNVAGLADLRTVHGSGHRRARRRRL                       | 157 | <i>Streptomyces</i> sp. MOE7 (WP_084772522)           | C.SPTFFANALRTVHGSGHRRARRRRL                               | 536 |
| <i>Streptomyces</i> sp. SC5IO 03032 (WP_086159477)    | TEHPEHNVAGLADLRTVHGSGHRRARRRRL                       | 157 | <i>Streptomyces</i> sp. SC5IO 03032 (WP_086159477)    | C.SPTFFANALRTVHGSGHRRARRRRL                               | 548 |
| <i>S. seoulensis</i> KCTC 9819 (WP_031181672)         | TEHPEHNVAGLADLRTVHGSGHRRARRRRL                       | 157 | <i>S. seoulensis</i> KCTC 9819 (WP_031181672)         | C.SPTFFANALRTVHGSGHRRARRRRL                               | 523 |
| <i>S. yanglinensis</i> CGMCC4.2023 (WP_103883902)     | TEHPEHNVAGLADLRTVHGSGHRRARRRRL                       | 157 | <i>S. yanglinensis</i> CGMCC4.2023 (WP_103883902)     | C.SPTFFANALRTVHGSGHRRARRRRL                               | 535 |
| <i>S. yanglinensis</i> 3-10 (MK861973)                | TEHPEHNVAGLADLRTVHGSGHRRARRRRL                       | 157 | <i>S. yanglinensis</i> 3-10 (MK861973)                | C.SPTFFANALRTVHGSGHRRARRRRL                               | 535 |
|                                                       | ep n veagladw rtvp s r z f t l                       |     |                                                       | p er l d w z t pm r                                       |     |
| <i>S. albiflavus</i> MDJK44 (WP_087886527)            | DESEWELSNINAGVNVHYEYEMRRRVGAWPAGSL                   | 200 | <i>S. albiflavus</i> MDJK44 (WP_087886527)            | DESEWELSNINAGVNVHYEYEMRRRVGAWPAGSL                        | 575 |
| <i>S. luteovercillatus</i> CGMCC 15060 (WP_126912889) | DESEWELSNINAGVNVHYEYEMRRRVGAWPAGSL                   | 197 | <i>S. luteovercillatus</i> CGMCC 15060 (WP_126912889) | DESEWELSNINAGVNVHYEYEMRRRVGAWPAGSL                        | 576 |
| <i>Streptomyces</i> sp. MOE7 (WP_084772522)           | DESEWELSNINAGVNVHYEYEMRRRVGAWPAGSL                   | 197 | <i>Streptomyces</i> sp. MOE7 (WP_084772522)           | DESEWELSNINAGVNVHYEYEMRRRVGAWPAGSL                        | 577 |
| <i>Streptomyces</i> sp. SC5IO 03032 (WP_086159477)    | DESEWELSNINAGVNVHYEYEMRRRVGAWPAGSL                   | 197 | <i>Streptomyces</i> sp. SC5IO 03032 (WP_086159477)    | DESEWELSNINAGVNVHYEYEMRRRVGAWPAGSL                        | 588 |
| <i>S. seoulensis</i> KCTC 9819 (WP_031181672)         | DESEWELSNINAGVNVHYEYEMRRRVGAWPAGSL                   | 197 | <i>S. seoulensis</i> KCTC 9819 (WP_031181672)         | DESEWELSNINAGVNVHYEYEMRRRVGAWPAGSL                        | 563 |
| <i>S. yanglinensis</i> CGMCC4.2023 (WP_103883902)     | DESEWELSNINAGVNVHYEYEMRRRVGAWPAGSL                   | 197 | <i>S. yanglinensis</i> CGMCC4.2023 (WP_103883902)     | DESEWELSNINAGVNVHYEYEMRRRVGAWPAGSL                        | 575 |
| <i>S. yanglinensis</i> 3-10 (MK861973)                | DESEWELSNINAGVNVHYEYEMRRRVGAWPAGSL                   | 197 | <i>S. yanglinensis</i> 3-10 (MK861973)                | DESEWELSNINAGVNVHYEYEMRRRVGAWPAGSL                        | 575 |
|                                                       | l es w elsn i n r np eylemrrrvqgawpaa l e            |     |                                                       | m sw we nq p vdy emrr tqg t                               |     |
| <i>S. albiflavus</i> MDJK44 (WP_087886527)            | ATGAEVFAVARRRVRVRLDITGFWHLRNLDSYQRE                  | 240 | <i>S. albiflavus</i> MDJK44 (WP_087886527)            | ATGAEVFAVARRRVRVRLDITGFWHLRNLDSYQRE                       | 615 |
| <i>S. luteovercillatus</i> CGMCC 15060 (WP_126912889) | ATGAEVFAVARRRVRVRLDITGFWHLRNLDSYQRE                  | 237 | <i>S. luteovercillatus</i> CGMCC 15060 (WP_126912889) | ATGAEVFAVARRRVRVRLDITGFWHLRNLDSYQRE                       | 616 |
| <i>Streptomyces</i> sp. MOE7 (WP_084772522)           | ATGAEVFAVARRRVRVRLDITGFWHLRNLDSYQRE                  | 237 | <i>Streptomyces</i> sp. MOE7 (WP_084772522)           | ATGAEVFAVARRRVRVRLDITGFWHLRNLDSYQRE                       | 617 |
| <i>Streptomyces</i> sp. SC5IO 03032 (WP_086159477)    | ATGAEVFAVARRRVRVRLDITGFWHLRNLDSYQRE                  | 237 | <i>Streptomyces</i> sp. SC5IO 03032 (WP_086159477)    | ATGAEVFAVARRRVRVRLDITGFWHLRNLDSYQRE                       | 628 |
| <i>S. seoulensis</i> KCTC 9819 (WP_031181672)         | ATGAEVFAVARRRVRVRLDITGFWHLRNLDSYQRE                  | 236 | <i>S. seoulensis</i> KCTC 9819 (WP_031181672)         | ATGAEVFAVARRRVRVRLDITGFWHLRNLDSYQRE                       | 603 |
| <i>S. yanglinensis</i> CGMCC4.2023 (WP_103883902)     | ATGAEVFAVARRRVRVRLDITGFWHLRNLDSYQRE                  | 237 | <i>S. yanglinensis</i> CGMCC4.2023 (WP_103883902)     | ATGAEVFAVARRRVRVRLDITGFWHLRNLDSYQRE                       | 615 |
| <i>S. yanglinensis</i> 3-10 (MK861973)                | ATGAEVFAVARRRVRVRLDITGFWHLRNLDSYQRE                  | 237 | <i>S. yanglinensis</i> 3-10 (MK861973)                | ATGAEVFAVARRRVRVRLDITGFWHLRNLDSYQRE                       | 615 |
|                                                       | a aep a srx rvl f d vhlrnlldsyqre                    |     |                                                       | r g p e e aa d l nd fcy                                   |     |
| <i>S. albiflavus</i> MDJK44 (WP_087886527)            | MEHGEHNVLVVDEHGGCATGARETVNLVDEHGG                    | 280 | <i>S. albiflavus</i> MDJK44 (WP_087886527)            | MEHGEHNVLVVDEHGGCATGARETVNLVDEHGG                         | 655 |
| <i>S. luteovercillatus</i> CGMCC 15060 (WP_126912889) | MEHGEHNVLVVDEHGGCATGARETVNLVDEHGG                    | 277 | <i>S. luteovercillatus</i> CGMCC 15060 (WP_126912889) | MEHGEHNVLVVDEHGGCATGARETVNLVDEHGG                         | 656 |
| <i>Streptomyces</i> sp. MOE7 (WP_084772522)           | MEHGEHNVLVVDEHGGCATGARETVNLVDEHGG                    | 277 | <i>Streptomyces</i> sp. MOE7 (WP_084772522)           | MEHGEHNVLVVDEHGGCATGARETVNLVDEHGG                         | 657 |
| <i>Streptomyces</i> sp. SC5IO 03032 (WP_086159477)    | MEHGEHNVLVVDEHGGCATGARETVNLVDEHGG                    | 276 | <i>Streptomyces</i> sp. SC5IO 03032 (WP_086159477)    | MEHGEHNVLVVDEHGGCATGARETVNLVDEHGG                         | 668 |
| <i>S. seoulensis</i> KCTC 9819 (WP_031181672)         | MEHGEHNVLVVDEHGGCATGARETVNLVDEHGG                    | 276 | <i>S. seoulensis</i> KCTC 9819 (WP_031181672)         | MEHGEHNVLVVDEHGGCATGARETVNLVDEHGG                         | 643 |
| <i>S. yanglinensis</i> CGMCC4.2023 (WP_103883902)     | MEHGEHNVLVVDEHGGCATGARETVNLVDEHGG                    | 277 | <i>S. yanglinensis</i> CGMCC4.2023 (WP_103883902)     | MEHGEHNVLVVDEHGGCATGARETVNLVDEHGG                         | 655 |
| <i>S. yanglinensis</i> 3-10 (MK861973)                | MEHGEHNVLVVDEHGGCATGARETVNLVDEHGG                    | 277 | <i>S. yanglinensis</i> 3-10 (MK861973)                | MEHGEHNVLVVDEHGGCATGARETVNLVDEHGG                         | 655 |
|                                                       | e ege n vlv e f q aa v t r qf                        |     |                                                       | kele ege hn lvqv f a dl r                                 |     |
| <i>S. albiflavus</i> MDJK44 (WP_087886527)            | BEHCHVAVVAVVDEHGGCATGARETVNLVDEHGG                   | 320 | <i>S. albiflavus</i> MDJK44 (WP_087886527)            | BEHCHVAVVAVVDEHGGCATGARETVNLVDEHGG                        | 695 |
| <i>S. luteovercillatus</i> CGMCC 15060 (WP_126912889) | BEHCHVAVVAVVDEHGGCATGARETVNLVDEHGG                   | 317 | <i>S. luteovercillatus</i> CGMCC 15060 (WP_126912889) | BEHCHVAVVAVVDEHGGCATGARETVNLVDEHGG                        | 696 |
| <i>Streptomyces</i> sp. MOE7 (WP_084772522)           | BEHCHVAVVAVVDEHGGCATGARETVNLVDEHGG                   | 317 | <i>Streptomyces</i> sp. MOE7 (WP_084772522)           | BEHCHVAVVAVVDEHGGCATGARETVNLVDEHGG                        | 697 |
| <i>Streptomyces</i> sp. SC5IO 03032 (WP_086159477)    | BEHCHVAVVAVVDEHGGCATGARETVNLVDEHGG                   | 316 | <i>Streptomyces</i> sp. SC5IO 03032 (WP_086159477)    | BEHCHVAVVAVVDEHGGCATGARETVNLVDEHGG                        | 708 |
| <i>S. seoulensis</i> KCTC 9819 (WP_031181672)         | BEHCHVAVVAVVDEHGGCATGARETVNLVDEHGG                   | 316 | <i>S. seoulensis</i> KCTC 9819 (WP_031181672)         | BEHCHVAVVAVVDEHGGCATGARETVNLVDEHGG                        | 693 |
| <i>S. yanglinensis</i> CGMCC4.2023 (WP_103883902)     | BEHCHVAVVAVVDEHGGCATGARETVNLVDEHGG                   | 317 | <i>S. yanglinensis</i> CGMCC4.2023 (WP_103883902)     | BEHCHVAVVAVVDEHGGCATGARETVNLVDEHGG                        | 695 |
| <i>S. yanglinensis</i> 3-10 (MK861973)                | BEHCHVAVVAVVDEHGGCATGARETVNLVDEHGG                   | 317 | <i>S. yanglinensis</i> 3-10 (MK861973)                | BEHCHVAVVAVVDEHGGCATGARETVNLVDEHGG                        | 695 |
|                                                       | e t c e e e l v y f kglqdg ggh                       |     |                                                       | f h n p f l y y i w a                                     |     |
| <i>S. albiflavus</i> MDJK44 (WP_087886527)            | EWHSRVRV...EGAVDRSF...EALGGFAGCHG                    | 348 | <i>S. albiflavus</i> MDJK44 (WP_087886527)            | EWHSRVRV...EGAVDRSF...EALGGFAGCHG                         | 721 |
| <i>S. luteovercillatus</i> CGMCC 15060 (WP_126912889) | EWHSRVRV...EGAVDRSF...EALGGFAGCHG                    | 348 | <i>S. luteovercillatus</i> CGMCC 15060 (WP_126912889) | EWHSRVRV...EGAVDRSF...EALGGFAGCHG                         | 734 |
| <i>Streptomyces</i> sp. MOE7 (WP_084772522)           | EWHSRVRV...EGAVDRSF...EALGGFAGCHG                    | 349 | <i>Streptomyces</i> sp. MOE7 (WP_084772522)           | EWHSRVRV...EGAVDRSF...EALGGFAGCHG                         | 728 |
| <i>Streptomyces</i> sp. SC5IO 03032 (WP_086159477)    | EWHSRVRV...EGAVDRSF...EALGGFAGCHG                    | 357 | <i>Streptomyces</i> sp. SC5IO 03032 (WP_086159477)    | EWHSRVRV...EGAVDRSF...EALGGFAGCHG                         | 740 |
| <i>S. seoulensis</i> KCTC 9819 (WP_031181672)         | EWHSRVRV...EGAVDRSF...EALGGFAGCHG                    | 343 | <i>S. seoulensis</i> KCTC 9819 (WP_031181672)         | EWHSRVRV...EGAVDRSF...EALGGFAGCHG                         | 713 |
| <i>S. yanglinensis</i> CGMCC4.2023 (WP_103883902)     | EWHSRVRV...EGAVDRSF...EALGGFAGCHG                    | 347 | <i>S. yanglinensis</i> CGMCC4.2023 (WP_103883902)     | EWHSRVRV...EGAVDRSF...EALGGFAGCHG                         | 735 |
| <i>S. yanglinensis</i> 3-10 (MK861973)                | EWHSRVRV...EGAVDRSF...EALGGFAGCHG                    | 347 | <i>S. yanglinensis</i> 3-10 (MK861973)                | EWHSRVRV...EGAVDRSF...EALGGFAGCHG                         | 733 |
|                                                       | ewh sr rvm ... g a d r r a r a ... v g v l a g f h g |     |                                                       | i wh xy                                                   |     |
| <i>S. albiflavus</i> MDJK44 (WP_087886527)            | ELAGIK.....ALMARTGAGGFFITGIVGVG                      | 378 | <i>S. albiflavus</i> MDJK44 (WP_087886527)            | ELAGIK.....ALMARTGAGGFFITGIVGVG                           | 738 |
| <i>S. luteovercillatus</i> CGMCC 15060 (WP_126912889) | ELAGIK.....ALMARTGAGGFFITGIVGVG                      | 378 | <i>S. luteovercillatus</i> CGMCC 15060 (WP_126912889) | ELAGIK.....ALMARTGAGGFFITGIVGVG                           | 748 |
| <i>Streptomyces</i> sp. MOE7 (WP_084772522)           | ELAGIK.....ALMARTGAGGFFITGIVGVG                      | 379 | <i>Streptomyces</i> sp. MOE7 (WP_084772522)           | ELAGIK.....ALMARTGAGGFFITGIVGVG                           | 745 |
| <i>Streptomyces</i> sp. SC5IO 03032 (WP_086159477)    | ELAGIK.....ALMARTGAGGFFITGIVGVG                      | 379 | <i>Streptomyces</i> sp. SC5IO 03032 (WP_086159477)    | ELAGIK.....ALMARTGAGGFFITGIVGVG                           | 761 |
| <i>S. seoulensis</i> KCTC 9819 (WP_031181672)         | ELAGIK.....ALMARTGAGGFFITGIVGVG                      | 373 | <i>S. seoulensis</i> KCTC 9819 (WP_031181672)         | ELAGIK.....ALMARTGAGGFFITGIVGVG                           | 719 |
| <i>S. yanglinensis</i> CGMCC4.2023 (WP_103883902)     | ELAGIK.....ALMARTGAGGFFITGIVGVG                      | 377 | <i>S. yanglinensis</i> CGMCC4.2023 (WP_103883902)     | ELAGIK.....ALMARTGAGGFFITGIVGVG                           | 750 |
| <i>S. yanglinensis</i> 3-10 (MK861973)                | ELAGIK.....ALMARTGAGGFFITGIVGVG                      | 377 | <i>S. yanglinensis</i> 3-10 (MK861973)                | ELAGIK.....ALMARTGAGGFFITGIVGVG                           | 757 |
|                                                       | t a r r h p v g                                      |     |                                                       | g l s a a r f s l l g d r g r f a a g                     |     |

Supplementary Figure S9. Geosmin synthase AA sequence alignment

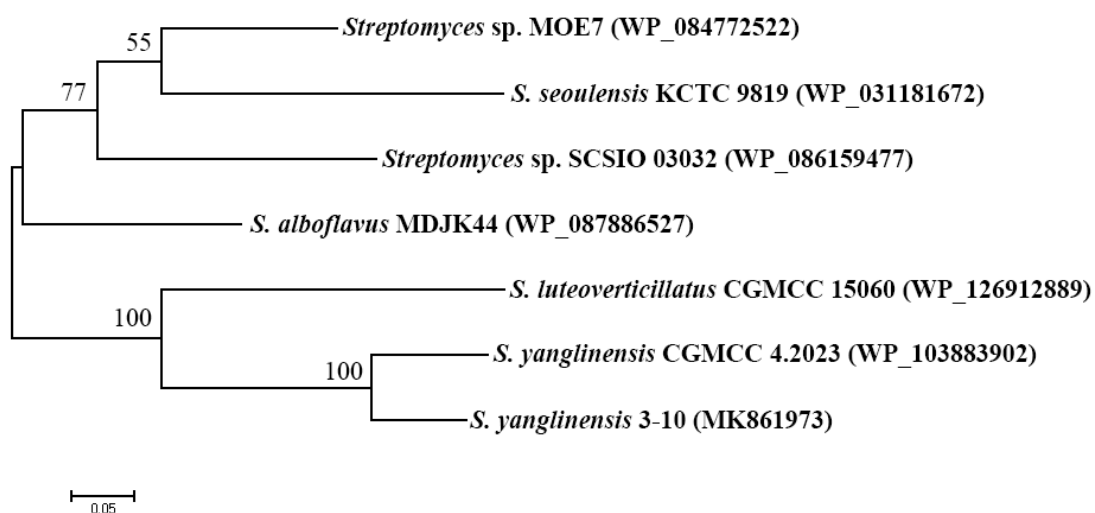

**Supplementary Figure S10.** A phylogenetic tree based on AA sequence of geosmin synthase using the maximum likelihood method. The numbers at the nodes in that tree indicate the bootstrap percentages ( $n = 1,000$ ). The bar indicates the average nucleotide change per site.

|                                                   |                                            |     |
|---------------------------------------------------|--------------------------------------------|-----|
| <i>S. violaceusniger</i> Tu 4113 (WP_014057868)   | MTKREGAAVLRSYSEFAVEEVLINARFAGGEHLVRIAGC    | 40  |
| <i>Streptomyces</i> sp. SM18 (WP_103492745)       | ..MRFGAAVLRAYDSAFITLVEEVLINAGFAGGEHLVRIAGC | 38  |
| <i>S. olivaceus</i> KLBMP 5084 (WP_070390057)     | ..MRFGAAVLRSYEERFAVEEVLINAGFAGGEHLVRIAGC   | 38  |
| <i>Streptomyces</i> sp. CCM_MD2014 (WP_061441492) | ..MRFGAAVLRSYEDFTVEEVLINAGFAGGEHLVRIAGC    | 38  |
| <i>Streptomyces</i> sp. Z022 (WP_121790184)       | ..MRFGAAVLRAYEDFAVEEVLIRTPAGGEHLVRIAGC     | 38  |
| <i>S. yanglinensis</i> CGMCC4.2023 (WP_103890507) | ..MRFGAAVLRGYDRFAVEEVLIDAVFAGGEHLVRIAGC    | 38  |
| 3-10 (MK861974)                                   | .....RFAVEEVLIRTPAGGEHLVRIAGC              | 25  |
|                                                   | f eev l pa ge lv iagc                      |     |
| <i>S. violaceusniger</i> Tu 4113 (WP_014057868)   | GMCRDLDVRRSAGGSPLFVLGHEGSGVVMETGG.PDTG     | 79  |
| <i>Streptomyces</i> sp. SM18 (WP_103492745)       | GMCRDLDVRRSAGGSPLFVLGHEGSGVVMETGG.GDTG     | 77  |
| <i>S. olivaceus</i> KLBMP 5084 (WP_070390057)     | GMCRDLDVRRSAGGSPLFVLGHEGSGVVAASGG.TGTG     | 77  |
| <i>Streptomyces</i> sp. CCM_MD2014 (WP_061441492) | GMCRDLDVRRSAGGSPLFVLGHEGSGVVMETGG.TGTG     | 77  |
| <i>Streptomyces</i> sp. Z022 (WP_121790184)       | GMCRDLDVRRSAGGSPLFVLGHEGSGVVAHAGGPTSG      | 78  |
| <i>S. yanglinensis</i> CGMCC4.2023 (WP_103890507) | GMCRDLDVRRSAGGSPLFVLGHEGSGVVMQTTGG.PDTG    | 77  |
| 3-10 (MK861974)                                   | GMCRDLDVRRSAGGSPLFVLGHEGSGVVMQTTGG.PDTG    | 64  |
|                                                   | gmcrtdlavr s g splp vlgheg g v gg g        |     |
| <i>S. violaceusniger</i> Tu 4113 (WP_014057868)   | LGVGDHVVLSDSCGCGNCLGAAPAYCDSFASLNLGGGR     | 119 |
| <i>Streptomyces</i> sp. SM18 (WP_103492745)       | LSVGDHVVLSDSCGCGCTCMGAAPAYCDSFASLNLGGGR    | 117 |
| <i>S. olivaceus</i> KLBMP 5084 (WP_070390057)     | LGVGDHVVLSDSCGCGSCLAGAAPAYCDSFASLNLGGGR    | 117 |
| <i>Streptomyces</i> sp. CCM_MD2014 (WP_061441492) | FSHGDHVVLSDSCGCGNCLGAAPAYCDSFASLNLGGGR     | 117 |
| <i>Streptomyces</i> sp. Z022 (WP_121790184)       | IGVGDHVVLSDSCGCGNCRGAAPAYCDSFASLNLGGGR     | 118 |
| <i>S. yanglinensis</i> CGMCC4.2023 (WP_103890507) | LDRGDHVVLSDSCGCGSCRGAAPAYCDSFASLNLGGGR     | 117 |
| 3-10 (MK861974)                                   | LDSGDHVVLSDSCGCGSCAAGAAYCDSFASLNLGGGR      | 104 |
|                                                   | gdhvvlslfscgc c c apaycdsfa lnl ggr        |     |
| <i>S. violaceusniger</i> Tu 4113 (WP_014057868)   | TEPARFTDAAGGLAPRWFGQSSFAEYAVVARNAVRVD      | 159 |
| <i>Streptomyces</i> sp. SM18 (WP_103492745)       | EDPAGRFDAAGGLAPRWFGQSSFAEYAVVARNAVRVD      | 157 |
| <i>S. olivaceus</i> KLBMP 5084 (WP_070390057)     | EDPAGRFDAAGGLAPRWFGQSSFAEYAVVARNAVRVD      | 157 |
| <i>Streptomyces</i> sp. CCM_MD2014 (WP_061441492) | EDPAGRFDTDTGTLAPRWFGQSSFAEYAVVARNAVRVD     | 157 |
| <i>Streptomyces</i> sp. Z022 (WP_121790184)       | KEPARFLTDATGGALAPRWFGQSSFAEYAVVARNAVRVD    | 158 |
| <i>S. yanglinensis</i> CGMCC4.2023 (WP_103890507) | KEPARFTDAAGGLAPRWFGQSSFAEYAVVARNAVRVD      | 157 |
| 3-10 (MK861974)                                   | REPARFTDAAGGLAPRWFGQSSFAEYAVVARNAVRVD      | 144 |
|                                                   | e a r d g laprwfgqs faeya v arnavrvd       |     |
| <i>S. violaceusniger</i> Tu 4113 (WP_014057868)   | SSLFVELLGLPLGCGFLTGAGAVNSFGAGPGDTIIVGAG    | 199 |
| <i>Streptomyces</i> sp. SM18 (WP_103492745)       | SSLFVELLGLPLGCGFLTGAGAVNSFGAGPGDTIVVGAG    | 197 |
| <i>S. olivaceus</i> KLBMP 5084 (WP_070390057)     | SSLFVELLGLPLGCGFLTGAGAVNSFGVAPGDTIVVGAG    | 197 |
| <i>Streptomyces</i> sp. CCM_MD2014 (WP_061441492) | SSLFVELLGLPLGCGFLTGAGAVNSFGAGPGDTIIVVGAG   | 197 |
| <i>Streptomyces</i> sp. Z022 (WP_121790184)       | SSLFVELLGLPLGCGFLTGAGAVNSFGAGPGDTIIVVGAG   | 198 |
| <i>S. yanglinensis</i> CGMCC4.2023 (WP_103890507) | SSLFVALLGLPLGCGFLTGAGAVNSFGTGPESIVVGAG     | 197 |
| 3-10 (MK861974)                                   | SSLFVELLGLPLGCGFLTGAGAVLHTRAGPGDSVVVGAG    | 184 |
|                                                   | lp llgplgcgfltggagav f pg v gag            |     |
| <i>S. violaceusniger</i> Tu 4113 (WP_014057868)   | AVGLAAVMATAAGATVAVDRHFERLAIAERLGA.SPLHA    | 239 |
| <i>Streptomyces</i> sp. SM18 (WP_103492745)       | AVGLAAVMATAAGATVAVDRHFERLAIAERLGA.VPLSA    | 237 |
| <i>S. olivaceus</i> KLBMP 5084 (WP_070390057)     | AVGLAAVMATAAGATVAVDRHFERLAIAERFRRIPLFA     | 237 |
| <i>Streptomyces</i> sp. CCM_MD2014 (WP_061441492) | AVGLAAVMATAAGATVAVDRHFERLAIAERFHVAVEFA     | 237 |
| <i>Streptomyces</i> sp. Z022 (WP_121790184)       | AVGLAAVMATAAGATVAVDRHFERLAIAERFGAIFPLFA    | 238 |
| <i>S. yanglinensis</i> CGMCC4.2023 (WP_103890507) | AVGLAAVMATAAGATVAVDRHFERLAIAERLGA.VPLFA    | 237 |
| 3-10 (MK861974)                                   | AVGLAAVMATAAGATVAVDRHFERLAIAERLGA.VEVFA    | 224 |
|                                                   | avglaa maa ga vavd h rla ae a a            |     |
| <i>S. violaceusniger</i> Tu 4113 (WP_014057868)   | ASAGTFEIRIRRLTDGGGAYALDTTGSARLINAIQLRLRF   | 279 |
| <i>Streptomyces</i> sp. SM18 (WP_103492745)       | ASPGTFGRIRRLTDGGGAYALDTTGSARLINAIQLRLRF    | 277 |
| <i>S. olivaceus</i> KLBMP 5084 (WP_070390057)     | ASTDFAHVRRLLTGGGAYALDTTGSARLINAIQLRLRF     | 277 |
| <i>Streptomyces</i> sp. CCM_MD2014 (WP_061441492) | TATGSDAVRLRLTGGGAYALDTTGSARLINAIQLRLRF     | 277 |
| <i>Streptomyces</i> sp. Z022 (WP_121790184)       | GTAGTFEIRIRRLTDGGGAYALDTTGSARLINAIQLRLRF   | 278 |
| <i>S. yanglinensis</i> CGMCC4.2023 (WP_103890507) | DTADTFEIRIRRLTDGGGAYALDTTGSARLINAIQLRLRF   | 277 |
| 3-10 (MK861974)                                   | AFAGTAARLRRLTDGGGAYALDTTGSARLINAIQLRLRF    | 264 |
|                                                   | l lt gga yalddt a lin al lrp               |     |
| <i>S. violaceusniger</i> Tu 4113 (WP_014057868)   | GLGLVARIHTLPLEHEGLDRGRISHICEGDVPGILL       | 319 |
| <i>Streptomyces</i> sp. SM18 (WP_103492745)       | GLGLVARIHTLPLEHEGLDRGRISHICEGDVPGILL       | 317 |
| <i>S. olivaceus</i> KLBMP 5084 (WP_070390057)     | GLGLVARIHTLPLEHEGLDRGRISHICEGDVPGILL       | 317 |
| <i>Streptomyces</i> sp. CCM_MD2014 (WP_061441492) | GLGLVARIHTLPLEHEGLDRGRISHICEGDVPGILL       | 317 |
| <i>Streptomyces</i> sp. Z022 (WP_121790184)       | GLGLVARIHTLPLEHEGLDRGRISHICEGDVPGILL       | 318 |
| <i>S. yanglinensis</i> CGMCC4.2023 (WP_103890507) | GLGLVARIHTLPLEHEGLDRGRISHICEGDVPGILL       | 317 |
| 3-10 (MK861974)                                   | GLGLVARIHTLPLEHEGLDRGRISHICEGDVPGILL       | 304 |
|                                                   | g lglvarl lp e g ld gr i hicedavpg l       |     |
| <i>S. violaceusniger</i> Tu 4113 (WP_014057868)   | PRITGLWQAGRFFPFCLRTYPLADINEABEDCDGRVVVK    | 359 |
| <i>Streptomyces</i> sp. SM18 (WP_103492745)       | PRITGLWQAGRFFPFCLRTYPLAGVNEABEDCDGRVVVK    | 357 |
| <i>S. olivaceus</i> KLBMP 5084 (WP_070390057)     | PRITGLWQAGRFFPFCLRTYPLADINEABEDCDGRVVVK    | 357 |
| <i>Streptomyces</i> sp. CCM_MD2014 (WP_061441492) | PRITGLWQAGRFFPFCLRTYPLADINEABEDCDGRVVVK    | 357 |
| <i>Streptomyces</i> sp. Z022 (WP_121790184)       | PRITGLWQAGRFFPFCLRTYPLADINEABEDCDGRVVVK    | 358 |
| <i>S. yanglinensis</i> CGMCC4.2023 (WP_103890507) | PRITGLWQAGRFFPFCLRTYPLADINEABEDCDGRVVVK    | 357 |
| 3-10 (MK861974)                                   | PRITGLWQAGRFFPFCLRTYPLAVNABEDCDGRVVVK      | 344 |
|                                                   | p l lwqa rfpfd l rtypla n ae dc grvvk      |     |
| <i>S. violaceusniger</i> Tu 4113 (WP_014057868)   | FVIVEAGTGR.....                            | 369 |
| <i>Streptomyces</i> sp. SM18 (WP_103492745)       | FVILE.....                                 | 362 |
| <i>S. olivaceus</i> KLBMP 5084 (WP_070390057)     | FVILEGLDWTSPH                              | 372 |
| <i>Streptomyces</i> sp. CCM_MD2014 (WP_061441492) | FVILEGRRH.....                             | 367 |
| <i>Streptomyces</i> sp. Z022 (WP_121790184)       | FVILEGRSR.....                             | 368 |
| <i>S. yanglinensis</i> CGMCC4.2023 (WP_103890507) | FVILE.....                                 | 362 |
| 3-10 (MK861974)                                   | FVILEGAGR.....                             | 354 |
|                                                   | pvl p                                      |     |

**Supplementary Figure S11.** Aryl-alcohol dehydrogenase (2-phenylethanol synthase) AA sequence alignment

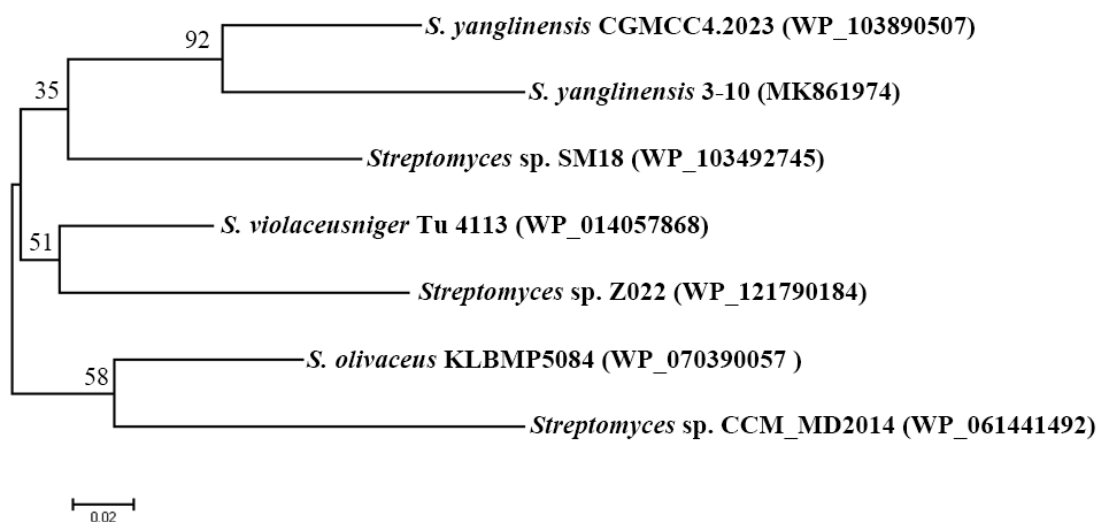

**Supplementary Figure S12.** A phylogenetic tree based on AA sequence of Aryl-alcohol dehydrogenase (2-phenylethanol synthase) using the maximum likelihood method. The numbers at the nodes in that tree indicate the bootstrap percentages ( $n = 1,000$ ). The bar indicates the average nucleotide change per site.

|                                                         |                                                 |     |
|---------------------------------------------------------|-------------------------------------------------|-----|
| <i>S. albireticuli</i> MDJK11 (WP_087927260)            | VEYEGGIDHVVYVLSNRKGLVHPTVIDIEADKERLSV           | 40  |
| <i>S. lydicus</i> 103 (WP_069566741)                    | VEYEGGIDHVVYVLSNRKGLVHPTVVSVEADKERLSV           | 40  |
| <i>Streptomyces</i> sp. NEAU-S7G82 (WP_093640877)       | VEYEGGIDHVVYVLSNRKGLVHPTVVSVEADKERLSI           | 40  |
| <i>S. luteovorticillatus</i> CGMCC 15060 (WP_126915025) | VEYEGGIDHVVYVLSNRKGLVHPTVIAFEADKERLSL           | 40  |
| <i>S. albus</i> CCRC 11814 (EOT04707)                   | VEYEGGIDHVVYVLSNRKGLVHPTVVSVEADKERLSV           | 40  |
| <i>S. yanglinensis</i> CGMCC (WP_103886000)             | VEYEGGIDHVVYVLSNRKGLVHPTVIDIEADKERLSV           | 40  |
| <i>S. yanglinensis</i> 3-10 (MK861976)                  | VEYEGGIDHVVYVLSNRKGLVHPTVIDIEADKERLSV           | 40  |
|                                                         | y yeggid v ylnsrkge hp v eadker ls              |     |
| <i>S. albireticuli</i> MDJK11 (WP_087927260)            | EITMQNNQYSEGVYSFANTHHEGGTHEEGFRAALTGL           | 80  |
| <i>S. lydicus</i> 103 (WP_069566741)                    | ELMQNNQYSEGVYSFANTHHEGGTHEEGFRAALTGL            | 80  |
| <i>Streptomyces</i> sp. NEAU-S7G82 (WP_093640877)       | ELMQNNQYSEGVYSFANTHHEGGTHEEGFRAALTGL            | 80  |
| <i>S. luteovorticillatus</i> CGMCC 15060 (WP_126915025) | EVSQNNQYSEGVYSFANTHHEGGTHEEGFRAALTGL            | 80  |
| <i>S. albus</i> CCRC 11814 (EOT04707)                   | ELMQNNQYSEGVYSFANTHHEGGTHEEGFRAALTGL            | 80  |
| <i>S. yanglinensis</i> CGMCC (WP_103886000)             | EVMQNNQYSEGVYSFANTHHEGGTHEEGFRAALTGL            | 80  |
| <i>S. yanglinensis</i> 3-10 (MK861976)                  | EVMQNNQYSEGVYSFANTHHEGGTHEEGFRAALTGL            | 80  |
|                                                         | mqnn qy egvysfan ithheggtheegfraaltgl           |     |
| <i>S. albireticuli</i> MDJK11 (WP_087927260)            | NRRYAREKLLREKDDNLTGDIRGLTAIISVKLGEPCF           | 120 |
| <i>S. lydicus</i> 103 (WP_069566741)                    | NRRYAREKLLREKDDNLTGDIRGLTAIISVKLGEPCF           | 120 |
| <i>Streptomyces</i> sp. NEAU-S7G82 (WP_093640877)       | NRRYAREKLLREKDDNLTGDIRGLTAIISVKLGEPCF           | 120 |
| <i>S. luteovorticillatus</i> CGMCC 15060 (WP_126915025) | NRRYAREKLLREKDDNLTGDIRGLTAIISVKLGEPCF           | 120 |
| <i>S. albus</i> CCRC 11814 (EOT04707)                   | NRRYAREKLLREKDDNLTGDIRGLTAIISVKLGEPCF           | 120 |
| <i>S. yanglinensis</i> CGMCC (WP_103886000)             | NRRYAREKLLREKDDNLTGDIRGLTAIISVKLGEPCF           | 120 |
| <i>S. yanglinensis</i> 3-10 (MK861976)                  | NRRYAREKLLREKDDNLTGDIRGLTAIISVKLGEPCF           | 120 |
|                                                         | nrryar kllrekddnlgt diregltaaisvkl epcf         |     |
| <i>S. albireticuli</i> MDJK11 (WP_087927260)            | EGQTKTKLGNTFKTVQKVHHELDWLDNRNPEADII             | 160 |
| <i>S. lydicus</i> 103 (WP_069566741)                    | EGQTKTKLGNTFKTVQKVHHELDWLDNRNPEADII             | 160 |
| <i>Streptomyces</i> sp. NEAU-S7G82 (WP_093640877)       | EGQTKTKLGNTFKTVQKVHHELDWLDNRNPEADII             | 160 |
| <i>S. luteovorticillatus</i> CGMCC 15060 (WP_126915025) | EGQTKTKLGNTFKTVQKVHHELDWLDNRNPEADII             | 160 |
| <i>S. albus</i> CCRC 11814 (EOT04707)                   | EGQTKTKLGNTFKTVQKVHHELDWLDNRNPEADII             | 160 |
| <i>S. yanglinensis</i> CGMCC (WP_103886000)             | EGQTKTKLGNTFKTVQKVHHELDWLDNRNPEADII             | 160 |
| <i>S. yanglinensis</i> 3-10 (MK861976)                  | EGQTKTKLGNTFKTVQKVHHELDWLDNRNPEADII             | 160 |
|                                                         | egqtktklgnte kt vqkv he l dwdlrnpnea dii        |     |
| <i>S. albireticuli</i> MDJK11 (WP_087927260)            | RKSIQAATARVAARKARDLTRRKGLLEASLPGKLSDCQS         | 200 |
| <i>S. lydicus</i> 103 (WP_069566741)                    | RKSIQAATARVAARKARDLTRRKGLLEASLPGKLSDCQS         | 200 |
| <i>Streptomyces</i> sp. NEAU-S7G82 (WP_093640877)       | RKSIQAATARVAARKARDLTRRKGLLEASLPGKLSDCQS         | 200 |
| <i>S. luteovorticillatus</i> CGMCC 15060 (WP_126915025) | RKSIQAATARVAARKARDLTRRKGLLEASLPGKLSDCQS         | 200 |
| <i>S. albus</i> CCRC 11814 (EOT04707)                   | RKSIQAATARVAARKARDLTRRKGLLEASLPGKLSDCQS         | 200 |
| <i>S. yanglinensis</i> CGMCC (WP_103886000)             | RKSIQAATARVAARKARDLTRRKGLLEASLPGKLSDCQS         | 200 |
| <i>S. yanglinensis</i> 3-10 (MK861976)                  | RKSIQAATARVAARKARDLTRRKGLLEASLPGKLSDCQS         | 200 |
|                                                         | rk siqaatarvaarkardltrrkglle aslpgklsdcqs       |     |
| <i>S. albireticuli</i> MDJK11 (WP_087927260)            | NIEPKCEIFIVEGDSAGGSAGSGRNEQYAILPIRGKILN         | 240 |
| <i>S. lydicus</i> 103 (WP_069566741)                    | NIEPKCEIFIVEGDSAGGSAGSGRNEQYAILPIRGKILN         | 240 |
| <i>Streptomyces</i> sp. NEAU-S7G82 (WP_093640877)       | NIEPKCEIFIVEGDSAGGSAGSGRNEQYAILPIRGKILN         | 240 |
| <i>S. luteovorticillatus</i> CGMCC 15060 (WP_126915025) | NIEPKCEIFIVEGDSAGGSAGSGRNEQYAILPIRGKILN         | 240 |
| <i>S. albus</i> CCRC 11814 (EOT04707)                   | NIEPKCEIFIVEGDSAGGSAGSGRNEQYAILPIRGKILN         | 240 |
| <i>S. yanglinensis</i> CGMCC (WP_103886000)             | NIEPKCEIFIVEGDSAGGSAGSGRNEQYAILPIRGKILN         | 240 |
| <i>S. yanglinensis</i> 3-10 (MK861976)                  | NIEPKCEIFIVEGDSAGGSAGSGRNEQYAILPIRGKILN         | 240 |
|                                                         | n p kceifivegdsaggsagsggrp yqailpirgkilyn       |     |
| <i>S. albireticuli</i> MDJK11 (WP_087927260)            | VEKARDKILQNEQALISAFGTGVHEDFDIKLRYHKI            | 280 |
| <i>S. lydicus</i> 103 (WP_069566741)                    | VEKARDKILQNEQALISAFGTGVHEDFDIKLRYHKI            | 280 |
| <i>Streptomyces</i> sp. NEAU-S7G82 (WP_093640877)       | VEKARDKILQNEQALISAFGTGVHEDFDIKLRYHKI            | 280 |
| <i>S. luteovorticillatus</i> CGMCC 15060 (WP_126915025) | VEKARDKILQNEQALISAFGTGVHEDFDIKLRYHKI            | 280 |
| <i>S. albus</i> CCRC 11814 (EOT04707)                   | VEKARDKILQNEQALISAFGTGVHEDFDIKLRYHKI            | 280 |
| <i>S. yanglinensis</i> CGMCC (WP_103886000)             | VEKARDKILQNEQALISAFGTGVHEDFDIKLRYHKI            | 280 |
| <i>S. yanglinensis</i> 3-10 (MK861976)                  | VEKARDKILQNEQALISAFGTGVHEDFDIKLRYHKI            | 280 |
|                                                         | vekar dkilqn e qalisafgtgvhedefdi klryhki       |     |
| <i>S. albireticuli</i> MDJK11 (WP_087927260)            | ILMADADVGGHINTLLTFLFRFMRPLVEAGHVYLSRPP          | 320 |
| <i>S. lydicus</i> 103 (WP_069566741)                    | ILMADADVGGHINTLLTFLFRFMRPLVEAGHVYLSRPP          | 320 |
| <i>Streptomyces</i> sp. NEAU-S7G82 (WP_093640877)       | ILMADADVGGHINTLLTFLFRFMRPLVEAGHVYLSRPP          | 320 |
| <i>S. luteovorticillatus</i> CGMCC 15060 (WP_126915025) | ILMADADVGGHINTLLTFLFRFMRPLVEAGHVYLSRPP          | 320 |
| <i>S. albus</i> CCRC 11814 (EOT04707)                   | ILMADADVGGHINTLLTFLFRFMRPLVEAGHVYLSRPP          | 320 |
| <i>S. yanglinensis</i> CGMCC (WP_103886000)             | ILMADADVGGHINTLLTFLFRFMRPLVEAGHVYLSRPP          | 320 |
| <i>S. yanglinensis</i> 3-10 (MK861976)                  | ILMADADVGGHINTLLTFLFRFMRPLVEAGHVYLSRPP          | 320 |
|                                                         | ilmadadvdghintlltflfrfmrplveaghvylsrpp          |     |
| <i>S. albireticuli</i> MDJK11 (WP_087927260)            | LRKRWGRDDIYAYSDEERDAIIEIGKQGRKIRBDSIQ           | 360 |
| <i>S. lydicus</i> 103 (WP_069566741)                    | LRKRWGRDDIYAYSDEERDAIIEIGKQGRKIRBDSIQ           | 360 |
| <i>Streptomyces</i> sp. NEAU-S7G82 (WP_093640877)       | LRKRWGRDDIYAYSDEERDAIIEIGKQGRKIRBDSIQ           | 360 |
| <i>S. luteovorticillatus</i> CGMCC 15060 (WP_126915025) | LRKRWGRDDIYAYSDEERDAIIEIGKQGRKIRBDSIQ           | 360 |
| <i>S. albus</i> CCRC 11814 (EOT04707)                   | LRKRWGRDDIYAYSDEERDAIIEIGKQGRKIRBDSIQ           | 360 |
| <i>S. yanglinensis</i> CGMCC (WP_103886000)             | LRKRWGRDDIYAYSDEERDAIIEIGKQGRKIRBDSIQ           | 360 |
| <i>S. yanglinensis</i> 3-10 (MK861976)                  | LRKRWGRDDIYAYSDEERDAIIEIGKQGRKIRBDSIQ           | 360 |
|                                                         | l k kw rdd eyaysd erdal i e igk q grk ir bds iq |     |
| <i>S. albireticuli</i> MDJK11 (WP_087927260)            | RFKGLGEMNAEELRTTMDIHRVLGVVLDAAADDLF             | 400 |
| <i>S. lydicus</i> 103 (WP_069566741)                    | RFKGLGEMNAEELRTTMDIHRVLGVVLDAAADDLF             | 400 |
| <i>Streptomyces</i> sp. NEAU-S7G82 (WP_093640877)       | RFKGLGEMNAEELRTTMDIHRVLGVVLDAAADDLF             | 400 |
| <i>S. luteovorticillatus</i> CGMCC 15060 (WP_126915025) | RFKGLGEMNAEELRTTMDIHRVLGVVLDAAADDLF             | 400 |
| <i>S. albus</i> CCRC 11814 (EOT04707)                   | RFKGLGEMNAEELRTTMDIHRVLGVVLDAAADDLF             | 400 |
| <i>S. yanglinensis</i> CGMCC (WP_103886000)             | RFKGLGEMNAEELRTTMDIHRVLGVVLDAAADDLF             | 400 |
| <i>S. yanglinensis</i> 3-10 (MK861976)                  | RFKGLGEMNAEELRTTMDIHRVLGVVLDAAADDLF             | 400 |
|                                                         | rfkglgemnaeelr ttmd dhrvlgv v lddaa addlf       |     |
| <i>S. albireticuli</i> MDJK11 (WP_087927260)            | SVLMGEDVEARRFIQRNAKDVRFELD                      | 426 |
| <i>S. lydicus</i> 103 (WP_069566741)                    | SVLMGEDVEARRFIQRNAKDVRFELD                      | 426 |
| <i>Streptomyces</i> sp. NEAU-S7G82 (WP_093640877)       | SVLMGEDVEARRFIQRNAKDVRFELD                      | 426 |
| <i>S. luteovorticillatus</i> CGMCC 15060 (WP_126915025) | SVLMGEDVEARRFIQRNAKDVRFELD                      | 426 |
| <i>S. albus</i> CCRC 11814 (EOT04707)                   | SVLMGEDVEARRFIQRNAKDVRFELD                      | 426 |
| <i>S. yanglinensis</i> CGMCC (WP_103886000)             | SVLMGEDVEARRFIQRNAKDVRFELD                      | 426 |
| <i>S. yanglinensis</i> 3-10 (MK861976)                  | SVLMGEDVEARRFIQRNAKDVRFELD                      | 426 |
|                                                         | svlmgedvearr fiqrnakdvrfeld                     |     |

Supplementary Figure S13. gyrB subunit AA sequence alignment

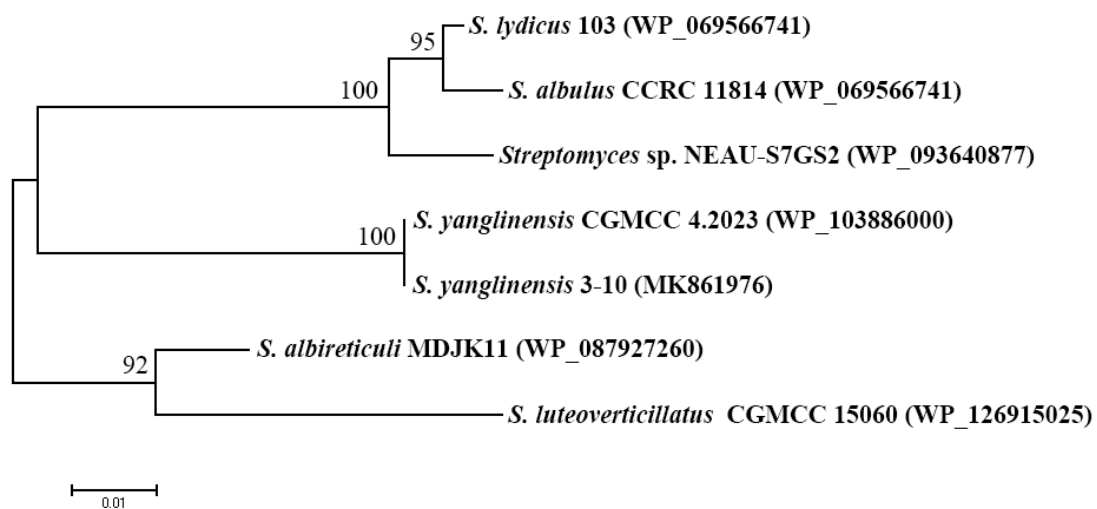

**Supplementary Figure S14.** A phylogenetic tree based on AA sequence of gyrB subunit using the maximum likelihood method. The numbers at the nodes in that tree indicate the bootstrap percentages ( $n = 1,000$ ). The bar indicates the average nucleotide change per site.

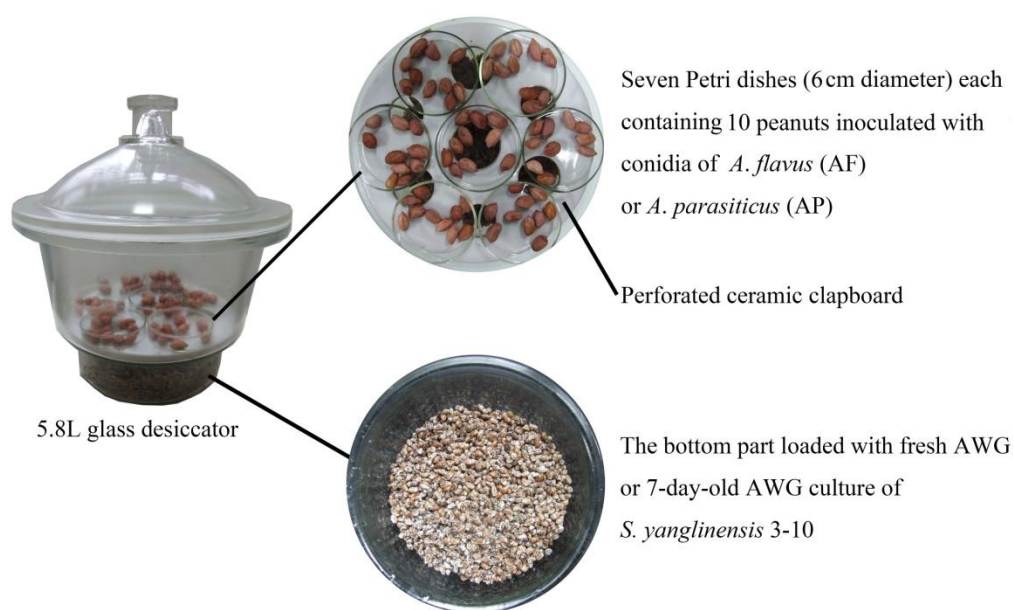

**Supplementary Figure S15.** A glass desiccator showing set-up of the bioassay for determination of the efficacy of the volatiles from *Streptomyces yanglinensis* 3-10 in suppression of colonization of peanut kernels by *Aspergillus flavus* and *A. parasiticus*.

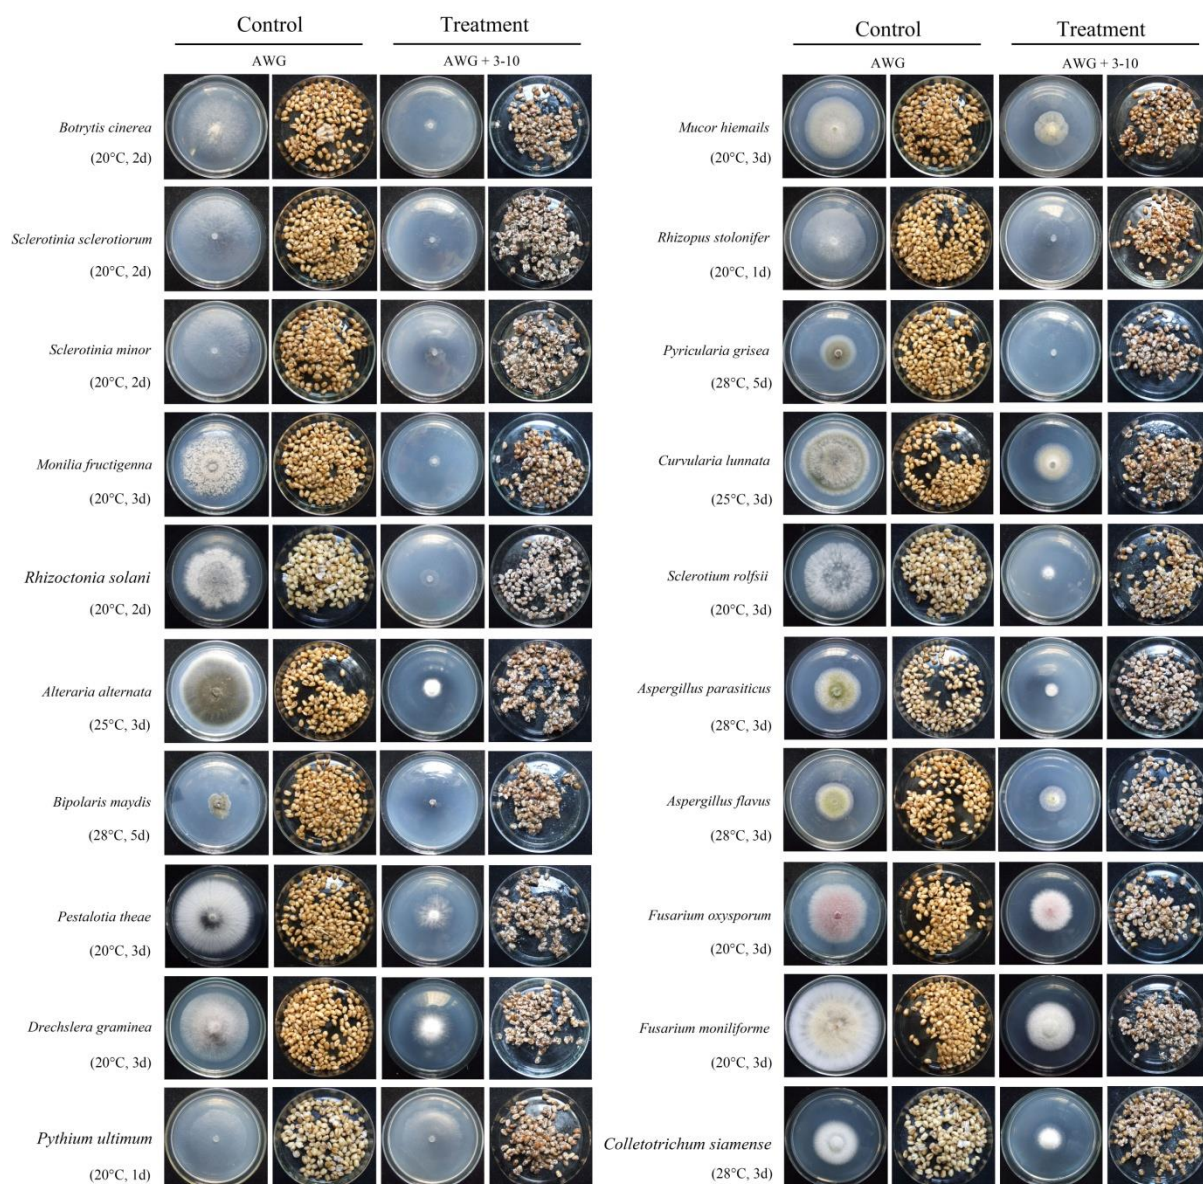

**Supplementary Figure S16.** Antifungal spectrum of the VOCs from *Streptomyces yanglinensis* 3-10.

Control = fresh AWG, Treatment = fumigated with the VOCs from the AWG cultures of *S. yanglinensis* 3-10

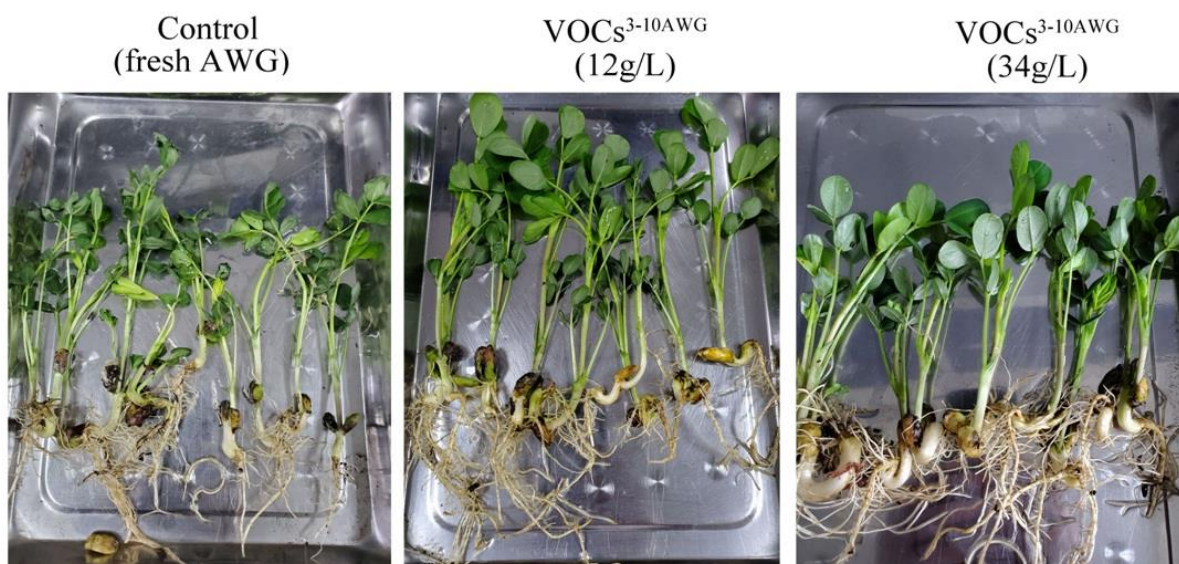

**Supplementary Figure S17.** Effect of the VOCs from the 7-day-old AWG culture of *Streptomyces yanglinensis* 3-10 (VOCs<sup>3-10AWG</sup>). AWG = autoclaved wheat grains. The seedlings were fumigated for seven days under the VOCs from fresh AWG or the AWG culture of *Streptomyces yanglinensis* 3-10.
